# Supplementary material
Source: PubMed Central journal article supplement (PMC10586492)
Supplement: ehp12097.s001.acco.pdf [file ehp12097.s001.acco.pdf]

**Note to readers with disabilities:** *EHP* strives to ensure that all journal content is accessible to all readers. However, some figures and Supplemental Material published in *EHP* articles may not conform to [508 standards](#) due to the complexity of the information being presented. If you need assistance accessing journal content, please contact [ehp508@niehs.nih.gov](mailto:ehp508@niehs.nih.gov). Our staff will work with you to assess and meet your accessibility needs within 3 working days.

### **Supplemental Material**

#### **Association of Prenatal Exposure to Organophosphate, Pyrethroid, and Neonicotinoid Insecticides with Child Neurodevelopment at 2 Years of Age: A Prospective Cohort Study**

Aizhen Wang, Yanjian Wan, Gaga Mahai, Xi Qian, Yuanyuan Li, Shunqing Xu, and Wei Xia

#### **Table of Contents**

**Figure S1.** Spearman's rank correlation analysis was conducted to explore the correlation matrix of the urinary specific gravity (SG)-adjusted concentrations of mOPPs, mPYRs, and mNNIs. Correlation matrix of analytes based on the averaged concentrations over the three trimesters among participants from a birth cohort study in Wuhan, China, 2014–2017 ( $N = 1041$  participants,  $n = 3123$  samples).  $*p < 0.05$ ;  $**p < 0.01$ . The correlation coefficients  $\geq 0.8$  were considered to indicate strong correlation, 0.5–0.8 were moderate, 0.3–0.5 were weak, and  $< 0.3$  were with no correlation ([Rumsey, 2011](#)). Details of chemical abbreviations are provided in Table S3 and the numerical values are listed in Excel Table S2.

**Figure S2.** Spearman's rank correlation analysis was conducted to explore the correlation matrix of the urinary specific gravity (SG)-adjusted concentrations of mOPPs, mPYRs, and mNNIs. Correlation matrix of analytes based on the concentrations in the 1st trimester among the participants from a birth cohort study in Wuhan, China, 2014–2017 ( $N = 1041$  participants,  $n = 1041$  samples).  $*p < 0.05$ ;  $**p < 0.01$ . Details of chemical abbreviations are provided in Table S3 and the numerical values are listed in Excel Table S3.

**Figure S3.** Spearman's rank correlation analysis was conducted to explore the correlation matrix of the urinary specific gravity (SG)-adjusted concentrations of mOPPs, mPYRs, and mNNIs. Correlation matrix of analytes based on the concentrations in the 2nd trimester among the participants from a birth cohort study in Wuhan, China, 2014–2017 ( $N = 1041$  participants,  $n = 1041$  samples).  $*p < 0.05$ ;  $**p < 0.01$ . Details of chemical abbreviations are provided in Table S3 and the numerical values are listed in Excel Table S4.

**Figure S4.** Spearman's rank correlation analysis was conducted to explore the correlation matrix of the urinary specific gravity (SG)-adjusted concentrations of mOPPs, mPYRs, and mNNIs. Correlation matrix of analytes based on the concentrations in the 3rd trimester among the participants from a birth cohort study in Wuhan, China, 2014–2017 ( $N = 1041$  participants,  $n = 1041$  samples).  $*p < 0.05$ ;  $**p < 0.01$ . Details of chemical abbreviations are provided in Table S3 and the numerical values are listed in Excel Table S5.

**Table S1.** Differences on the demographic characteristics of mother-child pairs among the recruited population ( $N = 5112$ ), the population of their children completing the evaluation of Bayley scales at two years old ( $N = 2782$ ), and the study population ( $N = 1041$ ) from Wuhan, China, 2014–2017.

**Table S2.** China Recommendations for total weight gain during pregnancy, by pre-pregnancy body mass index (BMI).

**Table S3.** Related information for target analytes ([Li et al., 2022](#); [Mahai et al., 2022](#)).

**Table S4.** The gradient of mobile phase (flow rate = 0.30 mL/min) for the analysis of target analytes (**except for** DAPs, PNP, and DN-IMI).

**Table S5.** The gradient of mobile phase (flow rate = 0.25 mL/min) for the analysis of DAPs, PNP, and DN-IMI.

**Table S6.** The distribution of the Bayley scores (means  $\pm$  SD) at two years of age based on the average urinary concentrations (ng/mL) of insecticide biomarkers throughout pregnancy for participants from a birth cohort study in Wuhan, China, 2014–2017 ( $N = 1041$  participants,  $n = 3123$  samples).

**Table S7.** Multivariate linear regression model evaluating associations between the average SG-adjusted maternal urinary analytes concentrations (ln-transformed, ng/mL) over three trimesters and children's MDI and PDI at two years of age in participants from a birth cohort study in Wuhan, China, 2014–2017 ( $N = 1041$  participants,  $n = 3123$  samples, data correspond to Figure 1).

**Table S8.** Generalized estimating equation model evaluating trimester-specific associations between SG-adjusted maternal urinary analytes concentrations (ln-transformed, ng/mL) with children's MDI and PDI scores at two years of age in participants from a birth cohort study in Wuhan, China, 2014–2017 ( $N = 1041$  participants,  $n = 1041$  samples for 1st trimester,  $n = 1041$  samples for 2nd trimester,  $n = 1041$  samples for 3rd trimester, data correspond to Figure 2).

**Table S9.** Weighted quantile sum regression (WQSR) analysis for the associations of weighted quantile sum regression index of pesticide biomarkers [based on the concentrations in the 1st trimester ( $N = 553$  participants,  $n = 553$  samples) and the averaged concentrations over the three trimesters ( $N = 553$  participants,  $n = 1659$  samples)] with boy's MDI scores estimated in the repeated holdout validation in participants from a birth cohort study in Wuhan, China, 2014–2017 (Data correspond to Figure 3).

**Table S10.** Weighted quantile sum regression (WQSR) analysis for the associations of weighted quantile sum regression index of pesticide biomarkers [based on the concentrations in the 1st trimester ( $N = 553$  participants,  $n = 553$  samples) and the averaged concentrations over the three trimesters ( $N = 553$  participants,  $n = 1659$  samples)] with boy's PDI scores ( $n = 553$ ) estimated in the repeated holdout validation in participants from a birth cohort study in Wuhan, China, 2014–2017.

**Table S11.** Comparison of the exposure levels and the associations of prenatal exposure to OPPs and PYRs (characterized by biomarkers) with child neurodevelopment observed in our study with other studies.

## References

**Additional File-** Excel Document

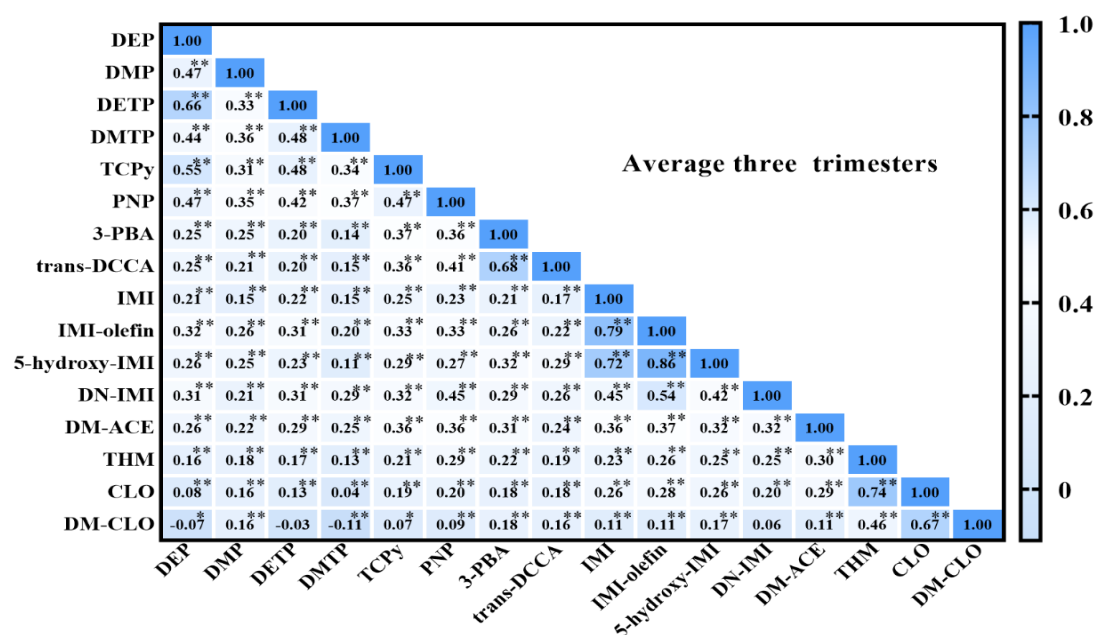

**Figure S1.** Spearman's rank correlation analysis was conducted to explore the correlation matrix of the urinary specific gravity (SG)-adjusted concentrations of mOPPs, mPYRs, and mNNIs. Correlation matrix of analytes based on the averaged concentrations over the three trimesters among participants from a birth cohort study in Wuhan, China, 2014–2017 ( $N = 1041$  participants,  $n = 3123$  samples). \* $p < 0.05$ ; \*\* $p < 0.01$ . The correlation coefficients  $\geq 0.8$  were considered to indicate strong correlation, 0.5–0.8 were moderate, 0.3–0.5 were weak, and  $< 0.3$  were with no correlation (Rumsey, 2011). Details of chemical abbreviations are provided in Table S3 and the numerical values are listed in Excel Table S2.

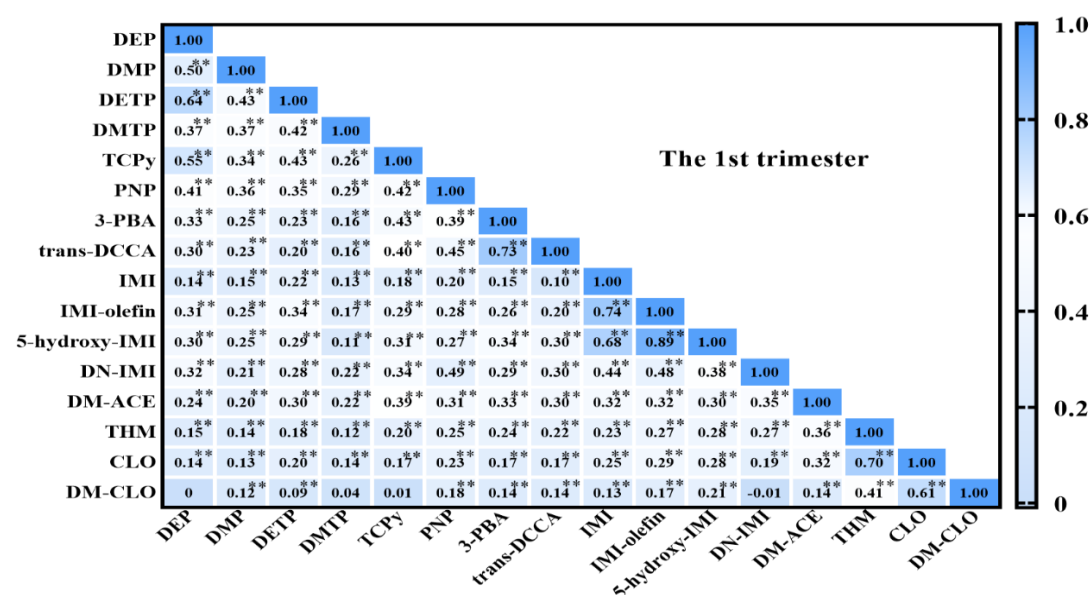

**Figure S2.** Spearman's rank correlation analysis was conducted to explore the correlation matrix of the urinary specific gravity (SG)-adjusted concentrations of mOPPs, mPYRs, and mNNIs. Correlation matrix of analytes based on the concentrations in the 1st trimester among the participants from a birth cohort study in Wuhan, China, 2014–2017 ( $N = 1041$  participants,  $n = 1041$  samples). \* $p < 0.05$ ; \*\* $p < 0.01$ . Details of chemical abbreviations are provided in Table S3 and the numerical values are listed in Excel Table S3.

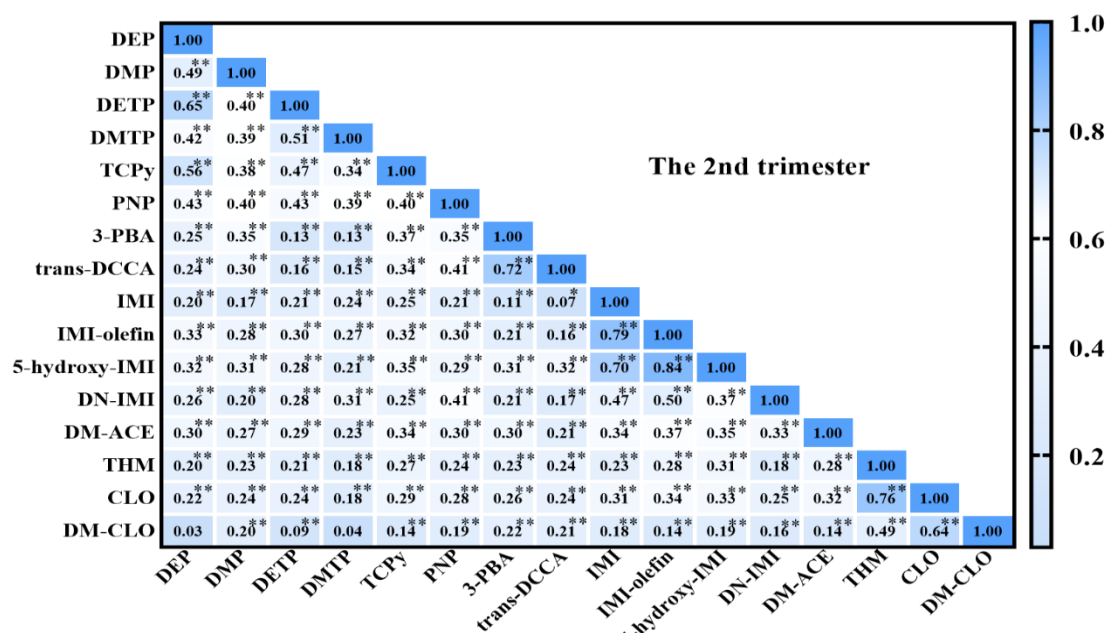

**Figure S3.** Spearman's rank correlation analysis was conducted to explore the correlation matrix of the urinary specific gravity (SG)-adjusted concentrations of mOPPs, mPYRs, and mNNIs. Correlation matrix of analytes based on the concentrations in the 2nd trimester among the participants from a birth cohort study in Wuhan, China, 2014–2017 ( $N = 1041$  participants,  $n = 1041$  samples). \* $p < 0.05$ ; \*\* $p < 0.01$ . Details of chemical abbreviations are provided in Table S3 and the numerical values are listed in Excel Table S4.

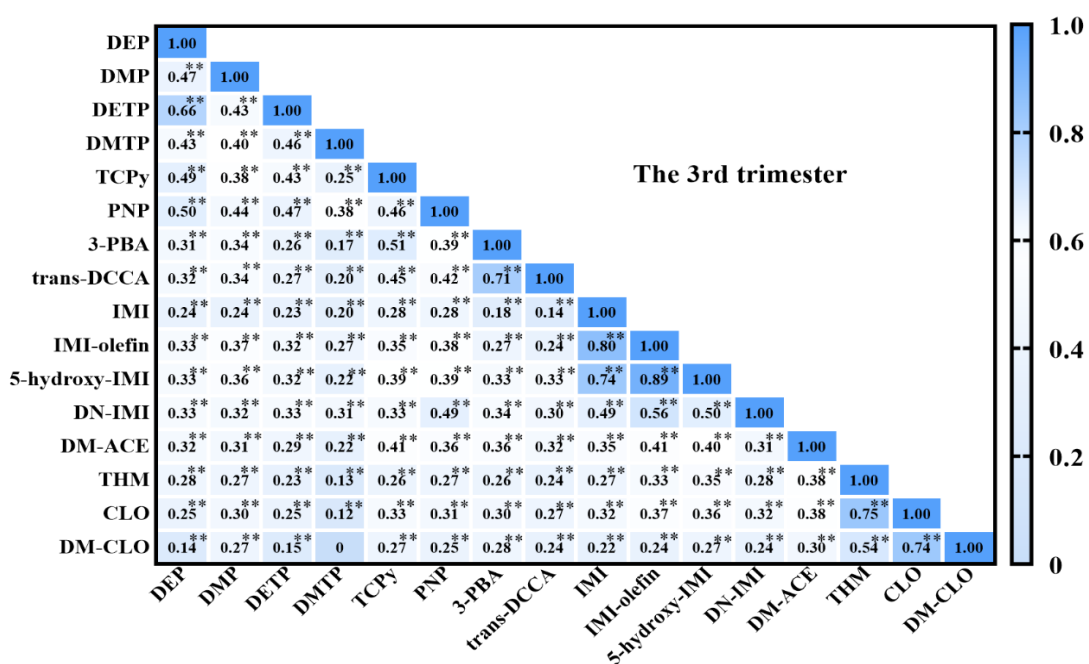

**Figure S4.** Spearman's rank correlation analysis was conducted to explore the correlation matrix of the urinary specific gravity (SG)-adjusted concentrations of mOPPs, mPYRs, and mNNIs. Correlation matrix of analytes based on the concentrations in the 3rd trimester among the participants from a birth cohort study in Wuhan, China, 2014–2017 ( $N = 1041$  participants,  $n = 1041$  samples). \* $p < 0.05$ ; \*\* $p < 0.01$ . Details of chemical abbreviations are provided in Table S3 and the numerical values are listed in Excel Table S5.

**Table S1.** Differences on the demographic characteristics of mother-child pairs among the recruited population ( $N = 5112$ ), the population of their children completing the evaluation of Bayley scales at two years old ( $N = 2782$ ), and the study population ( $N = 1041$ ) from Wuhan, China, 2014–2017.

| Characteristic                                | Total population recruited ( $N = 5112$ ) | Population completing the evaluation of Bayley scales ( $N = 2782$ ) | Study Population ( $N = 1041$ ) | <i>p</i> -value |
|-----------------------------------------------|-------------------------------------------|----------------------------------------------------------------------|---------------------------------|-----------------|
|                                               | N (%) or Mean $\pm$ SD                    | N (%) or Mean $\pm$ SD                                               | N (%) or Mean $\pm$ SD          |                 |
| <b>Total</b>                                  | 5112                                      | 2782                                                                 | 1041                            |                 |
| <b>Maternal characteristics</b>               |                                           |                                                                      |                                 |                 |
| <b>Age at delivery (years)</b>                | 29.1 $\pm$ 3.71                           | 29.1 $\pm$ 3.67                                                      | 29.4 $\pm$ 3.68                 | 0.14            |
| <25                                           | 392 (7.67%)                               | 196 (7.05%)                                                          | 60 (5.80%)                      |                 |
| 25–29                                         | 2806 (54.9%)                              | 1538 (55.3%)                                                         | 548 (52.6%)                     |                 |
| 30–34                                         | 1465 (28.7%)                              | 802 (28.8%)                                                          | 330 (31.7%)                     |                 |
| $\geq 35$                                     | 449 (8.78%)                               | 246 (8.84%)                                                          | 103 (9.90%)                     |                 |
| <b>Pre-pregnancy BMI (kg/m<sup>2</sup>)</b>   | 20.9 $\pm$ 2.88                           | 21.0 $\pm$ 2.89                                                      | 21.1 $\pm$ 2.91                 | 0.90            |
| <18.5                                         | 999 (19.5%)                               | 556 (19.9%)                                                          | 195 (18.7%)                     |                 |
| 18.5–23.9                                     | 3404 (66.6%)                              | 1840 (66.2%)                                                         | 694 (66.7%)                     |                 |
| $\geq 24$                                     | 709 (13.9%)                               | 386 (13.9%)                                                          | 152 (14.6%)                     |                 |
| <b>Maternal education level</b>               |                                           |                                                                      |                                 | 0.87            |
| $\leq$ High-school degree                     | 1074 (21%)                                | 562 (20.2%)                                                          | 214 (20.6%)                     |                 |
| Bachelor's degree                             | 3731 (73%)                                | 2061 (74.1%)                                                         | 763 (73.3%)                     |                 |
| $\geq$ Master's degree                        | 307 (6.01%)                               | 159 (5.72%)                                                          | 64 (6.1%)                       |                 |
| <b>Household income (CNY)</b>                 |                                           |                                                                      |                                 | 0.22            |
| <50,000                                       | 612 (12%)                                 | 334 (12.0%)                                                          | 120 (11.5%)                     |                 |
| 50,000–100,000                                | 1725 (33.7%)                              | 992 (35.7%)                                                          | 384 (36.9%)                     |                 |
| $\geq 100,000$                                | 2775 (54.3%)                              | 1456 (52.3%)                                                         | 537 (51.6%)                     |                 |
| <b>Parity</b>                                 |                                           |                                                                      |                                 | 0.13            |
| Nulliparous                                   | 3945 (77.2%)                              | 2220 (79.8%)                                                         | 806 (77.4%)                     |                 |
| Multiparous                                   | 1167 (22.8%)                              | 562 (20.2%)                                                          | 235 (22.6%)                     |                 |
| <b>Delivery mode</b>                          |                                           |                                                                      |                                 | 0.32            |
| Vaginal delivery                              | 2447 (47.9%)                              | 1381 (49.6%)                                                         | 507 (48.7%)                     |                 |
| Cesarean delivery                             | 2665 (52.1%)                              | 1401 (50.4%)                                                         | 534 (51.3%)                     |                 |
| <b>GWG categories according to NHC</b>        |                                           |                                                                      |                                 | 0.22            |
| Inadequate total GWG                          | 734 (14.4%)                               | 422 (15.2%)                                                          | 165 (15.9%)                     |                 |
| Adequate total GWG                            | 1997 (39.1%)                              | 1110 (39.9%)                                                         | 428 (41.2%)                     |                 |
| Excessive total GWG                           | 2381 (46.6%)                              | 1250 (44.9%)                                                         | 447 (42.9%)                     |                 |
| <b>Passive smoking during pregnancy</b>       |                                           |                                                                      |                                 | 0.36            |
| Yes                                           | 1188 (23.2%)                              | 673 (24.2%)                                                          | 261 (25.1%)                     |                 |
| No                                            | 3924 (76.8%)                              | 2109 (75.8%)                                                         | 780 (74.9%)                     |                 |
| <b>Folic acid supplement during pregnancy</b> |                                           |                                                                      |                                 | 0.44            |
| Yes                                           | 4529 (88.6%)                              | 2478 (89.1%)                                                         | 912 (87.6%)                     |                 |
| No                                            | 583 (11.4%)                               | 304 (10.9%)                                                          | 129 (12.4%)                     |                 |
| <b>Maternal anemia</b>                        |                                           |                                                                      |                                 | 0.13            |
| Yes                                           | 279 (5.46%)                               | 136 (4.89%)                                                          | 42 (4.0%)                       |                 |

| Characteristic                         | Total population recruited (N = 5112) | Population completing the evaluation of Bayley scales (N = 2782) | Study Population (N = 1041) | p-value |
|----------------------------------------|---------------------------------------|------------------------------------------------------------------|-----------------------------|---------|
|                                        | N (%) or Mean ± SD                    | N (%) or Mean ± SD                                               | N (%) or Mean ± SD          |         |
| No                                     | 4833 (94.5%)                          | 2646 (95.1%)                                                     | 999 (96.0%)                 | 0.51    |
| <b>Hypertension in pregnancy</b>       |                                       |                                                                  |                             |         |
| Yes                                    | 145 (2.84%)                           | 70 (2.52%)                                                       | 24 (2.30%)                  | 0.94    |
| No                                     | 4967 (97.2%)                          | 2712 (97.5%)                                                     | 1017 (97.7%)                |         |
| <b>Gestational diabetes</b>            |                                       |                                                                  |                             | 0.94    |
| Yes                                    | 482 (9.43%)                           | 269 (9.67%)                                                      | 98 (9.40%)                  |         |
| No                                     | 4630 (90.6%)                          | 2513 (90.3%)                                                     | 943 (90.6%)                 | 0.25    |
| <b>Paternal education level</b>        |                                       |                                                                  |                             |         |
| ≤High-school degree                    | 1195 (23.4%)                          | 639 (23.0%)                                                      | 209 (20.1%)                 |         |
| Bachelor's degree                      | 3682 (72%)                            | 2017 (72.5%)                                                     | 783 (75.2%)                 |         |
| ≥Master's degree                       | 235 (4.6%)                            | 126 (4.53%)                                                      | 49 (4.70%)                  | 0.97    |
| <b>Child characteristics</b>           |                                       |                                                                  |                             |         |
| <b>Child's sex</b>                     |                                       |                                                                  |                             | 0.97    |
| Boy                                    | 2700 (52.8%)                          | 1466 (52.7%)                                                     | 553 (53.1%)                 |         |
| Girl                                   | 2412 (47.2%)                          | 1316 (47.3%)                                                     | 488 (46.9%)                 | 0.83    |
| <b>Birth weight (g)</b>                | 3337 ± 434                            | 3355 ± 424                                                       | 3355 ± 424                  |         |
| <2500 (low birth weight)               | 128 (2.5%)                            | 68 (2.44%)                                                       | 21 (2.02%)                  |         |
| 2500–4000                              | 4678 (91.5%)                          | 2558 (92.0%)                                                     | 956 (91.8%)                 |         |
| >4000                                  | 306 (5.99%)                           | 156 (5.61%)                                                      | 64 (6.15%)                  | 0.73    |
| <b>Gestational age (wks)</b>           | 39.3 ± 1.2                            | 39.3 ± 1.16                                                      | 39.4 ± 1.1                  |         |
| <37 (preterm birth)                    | 158 (3.09%)                           | 80 (2.88%)                                                       | 28 (2.70%)                  |         |
| ≥37                                    | 4954 (96.9%)                          | 2702 (97.1%)                                                     | 1013 (97.3%)                |         |
| <b>Breastfeeding duration (months)</b> |                                       |                                                                  |                             | 0.32    |
| <6                                     | 2239 (45.2%)                          | 1250 (46.3%)                                                     | 437 (43.2%)                 |         |
| ≥6                                     | 2714 (54.8%)                          | 1449 (53.7%)                                                     | 574 (56.8%)                 |         |
| Missing                                | 159                                   | 83                                                               | 30                          |         |

Abbreviations: SD, standard deviation; BMI, body mass index; GWG, gestational weight gain; NHC, National Health Commission of the People's Republic of China. Values are mean ± standard deviation or numbers (percentage). p-values were derived from Chi-square test, p-values < 0.05 were considered statistically significant.

**Table S2.** China Recommendations for total weight gain during pregnancy, by pre-pregnancy body mass index (BMI).

| PBMI                                              | GWG (kg)   |             |           |
|---------------------------------------------------|------------|-------------|-----------|
|                                                   | Inadequate | Recommended | Excessive |
| <b>Underweight (&lt;18.5 kg/m<sup>2</sup>)</b>    | <12.5      | 12.5–18     | >18       |
| <b>Normal weight (18.5–23.9 kg/m<sup>2</sup>)</b> | <11.5      | 11.5–16     | >16       |
| <b>Overweight (24.0–27.9 kg/m<sup>2</sup>)</b>    | <7         | 7–11.5      | >11.5     |
| <b>Obese (≥28.0 kg/m<sup>2</sup>)</b>             | <5         | 5–9         | >9        |

Abbreviations: BMI, body mass index; GWG, gestational weight gain; GWG (kg) for different PBMI (kg/m<sup>2</sup>) is divided into three groups based on recommendation of the National Health Commission of the People's Republic of China ([NHC, 2022](#))

**Table S3.** Related information for target analytes (Li et al., 2022; Mahai et al., 2022).

| Abbreviation                   | Full name of the analyte                                           | LOQ; MDL (ng/mL) | Catalog No. | Purity (%) | CAS No.      | #LogKow; logP | Formula                                                                      | Structure                                                                             | Parent m/z | Product ① m/z | Product ② m/z    | DP (V) | CE (eV)  | RT   |
|--------------------------------|--------------------------------------------------------------------|------------------|-------------|------------|--------------|---------------|------------------------------------------------------------------------------|---------------------------------------------------------------------------------------|------------|---------------|------------------|--------|----------|------|
| <b>The metabolites of OPPs</b> |                                                                    |                  |             |            |              |               |                                                                              |                                                                                       |            |               |                  |        |          |      |
| DMP                            | Dimethyl phosphate                                                 | 0.05; 0.25       | TRC D476995 | 98.0       | 813-78-5     | -0.66; -0.99  | C <sub>2</sub> H <sub>7</sub> O <sub>4</sub> P                               |    | 125        | 78.95         | 63               | -30    | -33, -22 | 1.93 |
| DMP-13C2                       | Dimethyl Phosphate-13C2 Sodium Salt                                | /                | TRC D477603 | 95%        | 157487-95-1  | /             | <sup>13</sup> C <sub>2</sub> H <sub>6</sub> NaO <sub>4</sub> P               |    | 127        | 78.95         | 63               | -35    | -33, -22 | 1.93 |
| DMTP                           | Dimethyl thiophosphate                                             | 0.05; 0.25       | TRC D495418 | 95%        | 1112-38-5    | 1.11; -0.38   | C <sub>2</sub> H <sub>7</sub> O <sub>3</sub> PS                              |    | 141        | 125.95        | 94.9; 95.9       | -20    | -20, -27 | 2.66 |
| DMTP-d6                        | O, O-Dimethyl Phosphorothionate-d6 Ammonium Salt                   | /                | TRC D477622 | 97%        | 1330162-95-2 | /             | C <sub>2</sub> H <sub>4</sub> D <sub>6</sub> NO <sub>3</sub> PS              |    | 147        | 129           | 96.9; 94.9; 78.9 | -20    | -21, -28 | 2.64 |
| DMDTP                          | Ammonium O, O-dimethyl phosphorodithioate                          | 0.05; 0.25       | TRC D472740 | 97%        | 1066-97-3    | 1.26; 0.65    | C <sub>2</sub> H <sub>10</sub> NO <sub>2</sub> PS <sub>2</sub>               |   | 157        | 141.95        | 111.9; 78.95     | -35    | -22, -28 | 3.58 |
| DMDTP-13C2                     | O, O-Bis[(13C) methyl] hydrogen phosphorodithioate ammoniate (1:1) | /                | TRC D472742 | 96%        | 1329610-82-3 | /             | <sup>13</sup> C <sub>2</sub> H <sub>10</sub> NO <sub>2</sub> PS <sub>2</sub> |  | 159        | 143           | 112; 78.95       | -35    | -22, -28 | 3.58 |
| DEP                            | Diethyl phosphate                                                  | 0.05; 0.25       | TRC P359430 | 95%        | 598-02-7     | 0.32; 0.08    | C <sub>4</sub> H <sub>11</sub> O <sub>4</sub> P                              |  | 153.05     | 78.95         | 125              | -20    | -26, -15 | 5.5  |



| Abbreviation                        | Full name of the analyte                                                          | LOQ; MDL (ng/mL) | Catalog No.       | Purity (%) | CAS No.      | #LogKow; logP | Formula                                                        | Structure                                                                             | Parent m/z       | Product ① m/z | Product ② m/z | DP (V) | CE (eV)  | RT   |
|-------------------------------------|-----------------------------------------------------------------------------------|------------------|-------------------|------------|--------------|---------------|----------------------------------------------------------------|---------------------------------------------------------------------------------------|------------------|---------------|---------------|--------|----------|------|
| DEP- <sup>13</sup> C <sub>4</sub>   | Diethyl Phosphate-13C4 Sodium Salt                                                | /                | TRC D444722       | 95%        | 1329613-90-2 | /             | 13C4H10NaO4P                                                   | 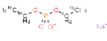   | 157.1            | 78.95;        | 127           | -20    | -26, -15 | 5.5  |
| DETP <sup>a</sup>                   | O, O-Diethyl Thiophosphate Ammonium Salt                                          | 0.01; 0.05       | TRC D445120       | 98%        | 5871-16-9    | 2.09; 0.68    | C <sub>4</sub> H <sub>14</sub> NO <sub>3</sub> PS              |    | 169              | 94.9          | 141           | -30    | -25, -17 | 7.38 |
| DETP-d10                            | O, O-Diethyl thiophosphate potassium salt (diethyl-d10,98%) 100 µg/mL in Methanol | /                | CIL, DLM-4852-1.2 | 98.0%      | 1435934-31-8 | /             | C4D10KO3PS                                                     |    | 179              | 94.9          | 147           | -30    | -27, -20 | 7.23 |
| DEDTP                               | O, O-Diethyl dithiophosphate                                                      | 0.05; 0.25       | TRC D444340       | >80%       | 298-06-6     | 2.24; 1.72    | C4H11O2PS2                                                     |    | 185              | 110.9         | 157           | -35    | -24, -18 | 8.28 |
| DEDTP- <sup>13</sup> C <sub>4</sub> | O, O-Diethyl Dithiophosphate-13C4 Ammonium Salt                                   |                  | TRC D444267       | 95.0%      | 1329641-22-6 | /             | 13C4H14NO2PS2                                                  |    | 189              | 110.9         | 159           | -35    | -24, -18 | 8.28 |
| TCPy                                | 3,5,6-trichloro-2-pyridinol                                                       | 0.20; 0.10       | TRC T773860       | 98.0%      | 6515-38-4    | 1.22; 2.16    | C5H2Cl3NO                                                      |   | 195.9;<br>197.9  | 35            | 37            | -30    | -43      | 8.57 |
| <sup>13</sup> C <sub>3</sub> -TCPY  | 3,5,6-Trichloro-2-pyridinol-13C5                                                  | /                | TRC T773862       | 95.0%      | 1330171-47-5 | /             | <sup>13</sup> C <sub>5</sub> H <sub>2</sub> Cl <sub>3</sub> NO |  | 199.1;<br>200.95 | 34.97         | 34.97         | -40    | -40, -15 | 8.57 |
| PNP                                 | 4-Nitrophenol                                                                     | 0.05; 0.25       | TRC N496945       | 98.0       | 100-02-7     | /             | C <sub>6</sub> H <sub>5</sub> NO <sub>3</sub>                  |  | 138              | 108           | 92;46;<br>66  | -30    | -21, -25 | 7.25 |

| Abbreviation                             | Full name of the analyte                                                 | LOQ; MDL (ng/mL) | Catalog No.       | Purity (%) | CAS No.      | #LogKow; logP | Formula                                                                    | Structure                                                                             | Parent m/z | Product ① m/z | Product ② m/z | DP (V) | CE (eV)        | RT   |
|------------------------------------------|--------------------------------------------------------------------------|------------------|-------------------|------------|--------------|---------------|----------------------------------------------------------------------------|---------------------------------------------------------------------------------------|------------|---------------|---------------|--------|----------------|------|
| PNP- <sup>13</sup> C <sub>6</sub>        | 4-Nitrophenol-13C6                                                       | /                | TRC N496909       | 98.0       | /            | /             | <sup>13</sup> C <sub>6</sub> H <sub>5</sub> NO <sub>3</sub>                | 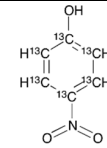   | 144        | 114           | 98            | -40    | -24, -31       | 7.25 |
| <b>The metabolites of PYRs</b>           |                                                                          |                  |                   |            |              |               |                                                                            |                                                                                       |            |               |               |        |                |      |
| 3-PBA                                    | 3-Phenoxybenzoic Acid                                                    | 0.02; 0.01       | TRC P228010       | 98.0       | 3739-38-6    | 3.93; 3.91    | C <sub>13</sub> H <sub>10</sub> O <sub>3</sub>                             |    | 213        | 93            | 169           | -35    | -28 -17        | 8.82 |
| 3-PBA- <sup>13</sup> C <sub>6</sub>      | 3-(Phenoxy-13C6) benzoic Acid                                            | /                | TRC P228012       | 97.0       | 1793055-05-6 | /             | C <sub>7</sub> <sup>13</sup> C <sub>6</sub> H <sub>10</sub> O <sub>3</sub> |    | 219.15     | 99            | 175.1         | -35    | -22, -15 - 28  | 8.82 |
| 4F-3PBA                                  | 4-Fluoro-3-phenoxy-benzoic acid                                          | 0.02; 0.01       | DRE-XA1379750 OAL | 98.4       | 77279-89-1   | 3.29; 4.05    | C <sub>13</sub> H <sub>9</sub> FO <sub>3</sub>                             |    | 231        | 186.95        | 92.95         | -35    | -20; -31       | 8.84 |
| <sup>13</sup> C <sub>6</sub> -4F-3PBA    | 4-Fluoro-3-phenoxy-benzoic acid-13C6                                     | /                | CLM-7389-1.2      | 98         | /            | /             | C <sub>7</sub> *C <sub>6</sub> H <sub>9</sub> FO <sub>3</sub>              |   | 237.1      | 193.1         | 99.05         | -35    | -20, -31       | 8.84 |
| trans-DCCA                               | Trans-3-(2,2-Dichloroethenyl)-2,2-dimethylcyclopropanecarboxylic acid    | 0.04; 0.02       | TRC P287705       | 98         | 59042-50-1   | 3.38; 2.53    | C <sub>8</sub> H <sub>10</sub> Cl <sub>2</sub> O <sub>2</sub>              |  | 207; 209   | 35            | 37            | -40    | -35            | 8.85 |
| <sup>13</sup> C <sub>2</sub> -trans-DCCA | TRANS-DCCA 100 UG/ML IN ACETONITRILE-D3 (1, CARBOXYL-13C2, 99%;1-D, 97%) | /                | CDLM-9206-1.2     | 97.0       | /            | /             | C <sub>6</sub> *C <sub>2</sub> H <sub>9</sub> DCI2O2                       |  | 210; 212   | 35            | 37            | -30    | -40; -39; - 37 | 8.85 |

| Abbreviation               | Full name of the analyte | LOQ; MDL<br>(ng/mL) | Catalog<br>No. | Purity<br>(%) | CAS No.      | #LogKow;<br>logP | Formula                                                                        | Structure                                                                             | Parent<br>m/z | Product<br>① m/z | Product<br>② m/z | DP (V) | CE (eV) | RT   |
|----------------------------|--------------------------|---------------------|----------------|---------------|--------------|------------------|--------------------------------------------------------------------------------|---------------------------------------------------------------------------------------|---------------|------------------|------------------|--------|---------|------|
| NNIs and their metabolites |                          |                     |                |               |              |                  |                                                                                |                                                                                       |               |                  |                  |        |         |      |
| ACE                        | Acetamiprid              | 0.02; 0.01          | TRC<br>A150800 | 99.7          | 135410-20-7  | 2.55; 0.62       | C <sub>10</sub> H <sub>11</sub> ClN <sub>4</sub>                               | 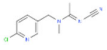   | 223.05        | 126.05           | 56.1             | 40     | 27, 19  | 6.89 |
| ACE-d3                     | Acetamiprid-d3           | /                   | TRC<br>A150802 | 99.5          | 1353869-35-8 | /                | C <sub>10</sub> H <sub>8</sub> D <sub>3</sub> ClN <sub>4</sub>                 |    | 226.1         | 125.9            | /                | 40     | 27      | 6.88 |
| CLO                        | Clothianidin             | 0.10; 0.05          | TRC<br>C588500 | 99.8          | 210880-92-5  | 0.64; 0.4        | C <sub>6</sub> H <sub>8</sub> ClN <sub>5</sub> O <sub>2</sub> S                |    | 250.02        | 169.1            | 132              | 20     | 18, 20  | 6.49 |
| CLO-d3                     | Clothianidin-d3          | /                   | Sigma<br>56816 | 97            | 1262776-24-8 | 0.64; -0.15      | C <sub>6</sub> H <sub>5</sub> D <sub>3</sub> ClN <sub>5</sub> O <sub>2</sub> S |    | 253.1         | 172.1            | 132              | 25     | 16, 19  | 6.49 |
| IMI                        | Imidacloprid             | 0.05; 0.025         | TRC<br>I274990 | 98            | 138261-41-3  | -0.41; -0.86     | C <sub>9</sub> H <sub>10</sub> ClN <sub>5</sub> O <sub>2</sub>                 |   | 256.05        | 209.1            | 175.1            | 30     | 21, 27  | 6.7  |
| IMI-d4                     | Imidacloprid-d4          | /                   | TRC<br>I274992 | 99.8          | 1015855-75-0 | -0.43; /         | C <sub>9</sub> H <sub>6</sub> D <sub>4</sub> ClN <sub>5</sub> O <sub>2</sub>   |  | 260.1         | 213.1            | 179.05           | 40     | 23, 27  | 6.68 |
| THM                        | Thiamethoxam             | 0.05; 0.025         | TRC<br>T344180 | 98            | 153719-23-4  | 0.8; -1.16       | C <sub>8</sub> H <sub>10</sub> ClN <sub>5</sub> O <sub>3</sub> S               |  | 292           | 211.1            | 132.05           | 25     | 17, 30  | 6.04 |

| Abbreviation                                             | Full name of the analyte                                            | LOQ; MDL<br>(ng/mL) | Catalog<br>No.        | Purity<br>(%) | CAS No.      | #LogKow;<br>logP | Formula                                                                                                   | Structure                                                                             | Parent<br>m/z | Product<br>① m/z | Product<br>② m/z | DP (V) | CE (eV)  | RT   |
|----------------------------------------------------------|---------------------------------------------------------------------|---------------------|-----------------------|---------------|--------------|------------------|-----------------------------------------------------------------------------------------------------------|---------------------------------------------------------------------------------------|---------------|------------------|------------------|--------|----------|------|
| THM-d4                                                   | Thiamethoxam-d <sub>4</sub>                                         | /                   | TRC<br>T344182        | 99.5          | 1331642-98-8 | /; -1.16         | C <sub>8</sub> H <sub>6</sub> D <sub>4</sub> ClN <sub>5</sub> O <sub>3</sub> S                            | 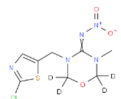   | 296.15        | 215.1            | 183.1            | 40     | 18, 31   | 6.03 |
| DM-ACE                                                   | Desmethyl-acetamiprid                                               | 0.02; 0.01          | Sigma<br>32979        | 99.4          | 190604-92-3  | 2.34; /          | C <sub>9</sub> H <sub>9</sub> ClN <sub>4</sub>                                                            |    | 209.05        | 126.05           | 90.05            | 40     | 23, 44   | 6.49 |
| DM-ACE- <sup>13</sup> C <sub>2</sub> <sup>15</sup> N     | Desmethyl-acetamiprid- <sup>13</sup> C <sub>2</sub> <sup>15</sup> N | /                   | CNLM-<br>10862-1.2    | 98            | /            | /                | C <sub>7</sub> <sup>13</sup> C <sub>2</sub> H <sub>9</sub> ClN <sub>3</sub> <sup>15</sup> N               |    | 212.1         | 126.1            | 99               | 40     | 22, 46   | 6.48 |
| DM-CLO                                                   | Desmethyl-clothianidin*                                             | 0.02; 0.01          | TRC<br>C597070        | 98            | 135018-15-4  | /                | C <sub>5</sub> H <sub>6</sub> ClN <sub>5</sub> O <sub>2</sub> S                                           |    | 234           | 57.95            | 152              | -40    | -20, -14 | 6.12 |
| 5-hydroxy-IMI                                            | 5-Hydroxy-imidacloprid <sup>Φ</sup>                                 | 0.10; 0.05          | CFW-<br>PN356900<br>U | 99.6          | 155802-61-2  | -0.98; /         | C <sub>9</sub> H <sub>10</sub> ClN <sub>5</sub> O <sub>3</sub>                                            |    | 272.1         | 191.1            | 225.1            | 35     | 23, 25   | 6.13 |
| IMI-olefin                                               | Imidacloprid-olefin                                                 | 0.05; 0.025         | TRC<br>I274995        | 96            | 115086-54-9  | 1.4; /           | C <sub>9</sub> H <sub>8</sub> ClN <sub>5</sub> O <sub>2</sub>                                             |   | 251.97        | 205              | 81               | -30    | -17, -15 | 5.95 |
| IMI-olefin- <sup>15</sup> N <sub>2</sub> <sup>13</sup> C | Imidacloprid-olefin- <sup>15</sup> N <sub>2</sub> <sup>13</sup> C   | /                   | CNLM-<br>10866-1.2    | 97            | /            | /                | C <sub>8</sub> <sup>13</sup> CH <sub>8</sub> ClN <sub>3</sub> <sup>15</sup> N <sub>2</sub> O <sub>2</sub> |  | 255.2         | 208              | 84               | -20    | -17, -15 | 5.94 |

| Abbreviation | Full name of the analyte | LOQ; MDL<br>(ng/mL) | Catalog<br>No.  | Purity<br>(%) | CAS No.     | #LogKow;<br>logP | Formula                                                                     | Structure                                                                           | Parent<br>m/z | Product<br>① m/z | Product<br>② m/z | DP (V) | CE (eV) | RT   |
|--------------|--------------------------|---------------------|-----------------|---------------|-------------|------------------|-----------------------------------------------------------------------------|-------------------------------------------------------------------------------------|---------------|------------------|------------------|--------|---------|------|
| DN-IMI       | Desnitro-imidacloprid    | 0.005;<br>0.025     | Sigma<br>37052  | 98            | 127202-53-3 | /                | C <sub>9</sub> H <sub>12</sub> Cl <sub>2</sub> N <sub>4</sub>               | 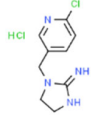 | 211.07        | 126.05           | 90.05            | 50     | 31, 47  | 7.44 |
| DN-IMI-d4    | Desnitro-imidacloprid-d4 | /                   | QCC<br>QI591805 | 98            | /           | /                | C <sub>9</sub> H <sub>8</sub> D <sub>4</sub> Cl <sub>2</sub> N <sub>4</sub> |  | 215.16        | 126.1            | 90.1             | 70     | 31, 48  | 7.42 |

QCC means it was purchased from QUALITY CONTROL CHEMICALS INC., Newark, DE, USA. DRE means it was purchased from Dr. Ehrenstorfer GmbH, Augsburg, Germany. Sigma means it was purchased from Sigma (Sigma-Aldrich Corp. St. Louis, MO, USA); CFW means it was purchased from CFW LABORATORIES, INC., Newark, DE, USA. CLM/CNLM means it was purchased from Cambridge Isotope Laboratories, Inc (Andover, MA); Cayman means it was purchased from Cayman Chemical (Ann Arbor, Michigan, USA); Other standards and the isotope labeled internal standards were all obtained from Toronto Research Chemical (North York, Ontario, Canada).

#The log Kow values for the analytes were from ChemSpider (<http://www.chemspider.com/>).

<sup>a</sup> Standards of DETP was of salt form, and the corresponding urinary free acid form concentration was calculated using the following formula:  $UC_f = UC_s * MW_f / MW_s$ , where  $UC_f$  was urinary free acid form concentration,  $UC_s$  was urinary salt form concentration,  $MW_f$  was molecular weight of free acid form, and  $MW_s$  was molecular weight of salt form.

※Φ\* means that for target analytes with no their corresponding internal standard, they share the internal standards of <sup>13</sup>C<sub>2</sub>-trans-DCCA, imidacloprid-d<sub>4</sub>, and Imidacloprid-olefin-<sup>15</sup>N<sub>2</sub><sup>13</sup>C, respectively.

Product① was used for quantification, and Product② for confirmation.

DP: declustering potential. CE: collision energy. RT: retention time. LOQ: limit of quantification. MDL: method detection limit.

The MDLs of DAPs, DN-IMI, and PNP were calculated based on the LOQs and the dilution factor (1: 5) while the MDLs of other analytes were calculated based on the LOQs and the dilution factor (2: 1).

**Table S4.** The gradient of mobile phase (flow rate = 0.30 mL/min) for the analysis of target analytes (**except for** DAPs, PNP, and DN-IMI).

| <b>Time (min)</b> | <b>0.05% formic acid in water (% , A)</b> | <b>acetonitrile (% , B)</b> |
|-------------------|-------------------------------------------|-----------------------------|
| 0                 | 98                                        | 2                           |
| 1                 | 96                                        | 4                           |
| 9                 | 1                                         | 99                          |
| 11.4              | 1                                         | 99                          |
| 11.5              | 98                                        | 2                           |
| 14.5              | 98                                        | 2                           |

**Table S5.** The gradient of mobile phase (flow rate = 0.25 mL/min) for the analysis of DAPs, PNP, and DN-IMI.

| <b>Time (min)</b> | <b>0.05% formic acid in water (% , A)</b> | <b>methanol (% , B)</b> |
|-------------------|-------------------------------------------|-------------------------|
| 0                 | 99                                        | 1                       |
| 1                 | 97                                        | 3                       |
| 6                 | 70                                        | 30                      |
| 8.5               | 1                                         | 99                      |
| 11.0              | 1                                         | 99                      |
| 11.1              | 99                                        | 1                       |
| 14.5              | 99                                        | 1                       |

**Table S6.** The distribution of the Bayley scores (means  $\pm$  SD) at two years of age based on the average urinary concentrations (ng/mL) of insecticide biomarkers throughout pregnancy for participants from a birth cohort study in Wuhan, China, 2014–2017 ( $N = 1041$  participants,  $n = 3123$  samples).

| Compound (ng/mL)          | MDI score, mean $\pm$ SD | PDI score, mean $\pm$ SD |
|---------------------------|--------------------------|--------------------------|
| <b>mOPPs</b>              |                          |                          |
| <b>DEP</b>                |                          |                          |
| Quartile1 ( $\leq 2.53$ ) | 110 $\pm$ 21.3           | 110 $\pm$ 16.7           |
| Quartile2 (2.53-3.97)     | 111 $\pm$ 21.7           | 110 $\pm$ 17.5           |
| Quartile3 (3.97-6.32)     | 110 $\pm$ 22.7           | 111 $\pm$ 16.6           |
| Quartile4 ( $\geq 6.32$ ) | 109 $\pm$ 21.5           | 112 $\pm$ 17.5           |
| <b>DMP</b>                |                          |                          |
| Quartile1 ( $\leq 2.97$ ) | 109 $\pm$ 21.4           | 109 $\pm$ 16.3           |
| Quartile2 (2.97-4.79)     | 111 $\pm$ 21.0           | 110 $\pm$ 17.2           |
| Quartile3 (4.79-7.78)     | 109 $\pm$ 23.1           | 111 $\pm$ 16.5           |
| Quartile4 ( $\geq 7.78$ ) | 111 $\pm$ 21.5           | 114 $\pm$ 18.0           |
| <b>DETP</b>               |                          |                          |
| Quartile1 ( $\leq 1.11$ ) | 110 $\pm$ 22.6           | 112 $\pm$ 17.0           |
| Quartile2 (1.11-1.88)     | 111 $\pm$ 20.5           | 110 $\pm$ 17.3           |
| Quartile3 (1.88-3.29)     | 109 $\pm$ 22.3           | 110 $\pm$ 16.4           |
| Quartile4 ( $\geq 3.29$ ) | 110 $\pm$ 21.7           | 112 $\pm$ 17.6           |
| <b>DMTP</b>               |                          |                          |
| Quartile1 ( $\leq 0.34$ ) | 109 $\pm$ 21.9           | 110 $\pm$ 15.3           |
| Quartile2 (0.34-0.57)     | 110 $\pm$ 21.6           | 112 $\pm$ 18.3           |
| Quartile3 (0.57-1.07)     | 110 $\pm$ 22.7           | 110 $\pm$ 17.1           |
| Quartile4 ( $\geq 1.07$ ) | 109 $\pm$ 21.0           | 112 $\pm$ 17.4           |
| <b>TCPy</b>               |                          |                          |
| Quartile1 ( $\leq 1.29$ ) | 111 $\pm$ 21.1           | 111 $\pm$ 17.4           |
| Quartile2 (1.29-1.87)     | 111 $\pm$ 22.9           | 111 $\pm$ 16.0           |
| Quartile3 (1.87-2.67)     | 111 $\pm$ 20.7           | 111 $\pm$ 17.7           |
| Quartile4 ( $\geq 2.67$ ) | 108 $\pm$ 22.2           | 111 $\pm$ 17.2           |
| <b>PNP</b>                |                          |                          |
| Quartile1 ( $\leq 1.53$ ) | 110 $\pm$ 20.6           | 112 $\pm$ 17.2           |
| Quartile2 (1.53-2.35)     | 112 $\pm$ 21.2           | 109 $\pm$ 16.3           |
| Quartile3 (2.35-3.49)     | 110 $\pm$ 22.1           | 110 $\pm$ 17.4           |
| Quartile4 ( $\geq 3.49$ ) | 107 $\pm$ 22.9           | 113 $\pm$ 17.2           |
| <b>mPYRs</b>              |                          |                          |
| <b>3-PBA</b>              |                          |                          |
| Quartile1 ( $\leq 0.11$ ) | 110 $\pm$ 21.9           | 110 $\pm$ 17.0           |
| Quartile2 (0.11-0.19)     | 111 $\pm$ 22.0           | 111 $\pm$ 15.7           |
| Quartile3 (0.19-0.38)     | 112 $\pm$ 21.3           | 112 $\pm$ 16.7           |
| Quartile4 ( $\geq 0.38$ ) | 107 $\pm$ 21.6           | 111 $\pm$ 18.7           |
| <b>trans-DCCA</b>         |                          |                          |
| Quartile1 ( $\leq 0.14$ ) | 111 $\pm$ 20.5           | 111 $\pm$ 16.1           |
| Quartile2 (0.14-0.24)     | 111 $\pm$ 22.3           | 111 $\pm$ 16.6           |
| Quartile3 (0.24-0.43)     | 109 $\pm$ 22.3           | 110 $\pm$ 17.5           |
| Quartile4 ( $\geq 0.43$ ) | 108 $\pm$ 21.9           | 111 $\pm$ 18.0           |
| <b>mNNIs</b>              |                          |                          |
| <b>IMI</b>                |                          |                          |
| Quartile1 ( $\leq 0.03$ ) | 109 $\pm$ 21.7           | 110 $\pm$ 16.8           |

| <b>Compound (ng/mL)</b>  | <b>MDI score, mean <math>\pm</math> SD</b> | <b>PDI score, mean <math>\pm</math> SD</b> |
|--------------------------|--------------------------------------------|--------------------------------------------|
| Quartile2 (0.03-0.05)    | 109 $\pm$ 23.4                             | 110 $\pm$ 17.8                             |
| Quartile3 (0.05-0.09)    | 111 $\pm$ 21.4                             | 112 $\pm$ 16.9                             |
| Quartile4 ( $\geq$ 0.09) | 111 $\pm$ 20.4                             | 112 $\pm$ 16.8                             |
| <b>IMI-olefin</b>        |                                            |                                            |
| Quartile1 ( $\leq$ 0.31) | 110 $\pm$ 22.3                             | 109 $\pm$ 16.9                             |
| Quartile2 (0.31-0.53)    | 109 $\pm$ 22.0                             | 111 $\pm$ 16.8                             |
| Quartile3 (0.53-1.01)    | 110 $\pm$ 22.9                             | 111 $\pm$ 17.8                             |
| Quartile4 ( $\geq$ 1.01) | 112 $\pm$ 19.8                             | 112 $\pm$ 16.7                             |
| <b>5-hydroxy-IMI</b>     |                                            |                                            |
| Quartile1 ( $\leq$ 0.48) | 109 $\pm$ 22.2                             | 110 $\pm$ 17.1                             |
| Quartile2 (0.48-0.93)    | 109 $\pm$ 22.7                             | 111 $\pm$ 17.2                             |
| Quartile3 (0.93-1.79)    | 111 $\pm$ 22.2                             | 111 $\pm$ 17.3                             |
| Quartile4 ( $\geq$ 1.79) | 110 $\pm$ 20.0                             | 112 $\pm$ 16.6                             |
| <b>DN-IMI</b>            |                                            |                                            |
| Quartile1 ( $\leq$ 0.06) | 110 $\pm$ 21.3                             | 110 $\pm$ 17.0                             |
| Quartile2 (0.06-0.11)    | 110 $\pm$ 21.5                             | 110 $\pm$ 17.1                             |
| Quartile3 (0.11-0.22)    | 110 $\pm$ 22.3                             | 113 $\pm$ 16.5                             |
| Quartile4 ( $\geq$ 0.22) | 109 $\pm$ 22.0                             | 111 $\pm$ 17.5                             |
| <b>DM-ACE</b>            |                                            |                                            |
| Quartile1 ( $\leq$ 0.70) | 109 $\pm$ 21.9                             | 111 $\pm$ 16.7                             |
| Quartile2 (0.70-1.13)    | 112 $\pm$ 20.7                             | 110 $\pm$ 17.2                             |
| Quartile3 (1.13-0.23)    | 108 $\pm$ 22.4                             | 111 $\pm$ 16.8                             |
| Quartile4 ( $\geq$ 0.23) | 111 $\pm$ 21.9                             | 112 $\pm$ 17.5                             |
| <b>THM</b>               |                                            |                                            |
| Quartile1 ( $\leq$ 0.06) | 107 $\pm$ 23.3                             | 110 $\pm$ 16.4                             |
| Quartile2 (0.06-0.11)    | 111 $\pm$ 21.5                             | 110 $\pm$ 17.8                             |
| Quartile3 (0.11-0.23)    | 111 $\pm$ 21.2                             | 111 $\pm$ 17.5                             |
| Quartile4 ( $\geq$ 0.23) | 111 $\pm$ 20.9                             | 113 $\pm$ 16.4                             |
| <b>CLO</b>               |                                            |                                            |
| Quartile1 ( $\leq$ 0.09) | 107 $\pm$ 23.3                             | 108 $\pm$ 16.9                             |
| Quartile2 (0.09-0.15)    | 110 $\pm$ 21.8                             | 111 $\pm$ 17.4                             |
| Quartile3 (0.15-0.27)    | 109 $\pm$ 22.4                             | 110 $\pm$ 16.9                             |
| Quartile4 ( $\geq$ 0.27) | 113 $\pm$ 18.9                             | 114 $\pm$ 16.7                             |
| <b>DM-CLO</b>            |                                            |                                            |
| Quartile1 ( $\leq$ 0.17) | 106 $\pm$ 22.6                             | 109 $\pm$ 17.7                             |
| Quartile2 (0.17-0.34)    | 108 $\pm$ 23.0                             | 110 $\pm$ 18.6                             |
| Quartile3 (0.34-0.58)    | 114 $\pm$ 19.9                             | 113 $\pm$ 15.5                             |
| Quartile4 ( $\geq$ 0.58) | 112 $\pm$ 20.6                             | 113 $\pm$ 15.9                             |

Abbreviation: SD, standard deviation; MDI, mental development index; PDI, psychomotor development index. Details of chemical abbreviations are provided in Table S3.



**Table S7.** Multivariate linear regression model evaluating associations between the average SG-adjusted maternal urinary analytes concentrations (ln-transformed, ng/mL) over three trimesters and children's MDI and PDI at two years of age in participants from a birth cohort study in Wuhan, China, 2014–2017 ( $N = 1041$  participants,  $n = 3123$  samples, data correspond to Figure 1).

| Compounds<br>(ng/mL) | MDI                           |       |         |                               |       |         |                               |      |         |               | PDI                           |      |         |                               |      |         |                               |      |         |               |
|----------------------|-------------------------------|-------|---------|-------------------------------|-------|---------|-------------------------------|------|---------|---------------|-------------------------------|------|---------|-------------------------------|------|---------|-------------------------------|------|---------|---------------|
|                      | All ( $n = 1041$ )            |       |         | Male ( $n = 553$ )            |       |         | Female ( $n = 488$ )          |      |         | $P_{sex-int}$ | All ( $n = 1041$ )            |      |         | Male ( $n = 553$ )            |      |         | Female ( $n = 488$ )          |      |         | $P_{sex-int}$ |
|                      | $\beta$ (95% CI) <sup>a</sup> | $P$   | $P-FDR$ | $\beta$ (95% CI) <sup>b</sup> | $P$   | $P-FDR$ | $\beta$ (95% CI) <sup>b</sup> | $P$  | $P-FDR$ |               | $\beta$ (95% CI) <sup>a</sup> | $P$  | $P-FDR$ | $\beta$ (95% CI) <sup>b</sup> | $P$  | $P-FDR$ | $\beta$ (95% CI) <sup>b</sup> | $P$  | $P-FDR$ |               |
| <b>mOPPs</b>         |                               |       |         |                               |       |         |                               |      |         |               |                               |      |         |                               |      |         |                               |      |         |               |
| DEP                  | -1.78 (-3.83, 0.27)           | 0.09  | 0.24    | <b>-3.79 (-6.77, -0.81)</b>   | 0.01  | 0.04    | 0.60 (-2.21, 3.41)            | 0.68 | 0.78    | 0.04          | -0.82 (-2.48, 0.83)           | 0.33 | 0.58    | <b>-2.41 (-4.69, -0.13)</b>   | 0.04 | 0.20    | 1.56 (-0.89, 4.01)            | 0.21 | 0.40    | 0.02          |
| DMP                  | 1.11 (-0.81, 3.04)            | 0.26  | 0.41    | 0.25 (-2.56, 3.06)            | 0.86  | 0.86    | 1.98 (-0.63, 4.58)            | 0.14 | 0.77    | 0.40          | <b>1.97 (0.43, 3.52)</b>      | 0.01 | 0.20    | 1.51 (-0.64, 3.65)            | 0.17 | 0.39    | <b>2.64 (0.37, 4.91)</b>      | 0.02 | 0.35    | 0.42          |
| DETP                 | -1.06 (-2.83, 0.70)           | 0.24  | 0.41    | <b>-2.94 (-5.58, -0.29)</b>   | 0.03  | 0.08    | 0.92 (-1.40, 3.24)            | 0.44 | 0.77    | 0.04          | -0.92 (-2.34, 0.50)           | 0.21 | 0.47    | -2.01 (-4.03, 0.01)           | 0.05 | 0.20    | 0.51 (-1.52, 2.53)            | 0.62 | 0.77    | 0.13          |
| DMTP                 | -0.54 (-2.15, 1.06)           | 0.51  | 0.67    | -1.25 (-3.64, 1.13)           | 0.30  | 0.44    | 0.37 (-1.76, 2.50)            | 0.73 | 0.78    | 0.28          | 0.24 (-1.06, 1.53)            | 0.72 | 0.77    | -0.79 (-2.61, 1.03)           | 0.40 | 0.59    | 1.60 (-0.25, 3.46)            | 0.09 | 0.35    | 0.10          |
| TCPy                 | <b>-2.82 (-5.28, -0.35)</b>   | 0.03  | 0.19    | <b>-5.51 (-9.13, -1.90)</b>   | 0.003 | 0.02    | 0.69 (-2.64, 4.02)            | 0.68 | 0.78    | 0.01          | -0.76 (-2.75, 1.23)           | 0.46 | 0.66    | -2.46 (-5.24, 0.32)           | 0.08 | 0.26    | 1.97 (-0.94, 4.87)            | 0.18 | 0.40    | 0.03          |
| PNP                  | -2.21 (-4.51, 0.09)           | 0.06  | 0.19    | <b>-4.50 (-7.97, -1.02)</b>   | 0.01  | 0.04    | -0.03 (-3.05, 2.99)           | 0.99 | 0.99    | 0.05          | 0.14 (-1.71, 2.00)            | 0.88 | 0.88    | -1.82 (-4.49, 0.85)           | 0.18 | 0.39    | 2.57 (-0.05, 5.20)            | 0.05 | 0.35    | 0.03          |
| <b>mPYRs</b>         |                               |       |         |                               |       |         |                               |      |         |               |                               |      |         |                               |      |         |                               |      |         |               |
| 3-PBA                | -0.97 (-2.46, 0.52)           | 0.20  | 0.40    | -2.22 (-4.46, 0.01)           | 0.05  | 0.12    | 0.48 (-1.47, 2.44)            | 0.63 | 0.78    | 0.07          | -0.30 (-1.50, 0.90)           | 0.62 | 0.73    | -1.12 (-2.84, 0.59)           | 0.20 | 0.39    | 0.81 (-0.90, 2.52)            | 0.35 | 0.51    | 0.09          |
| trans-DCCA           | <b>-1.63 (-3.16, -0.11)</b>   | 0.04  | 0.19    | <b>-3.50 (-5.78, -1.22)</b>   | 0.003 | 0.02    | 0.43 (-1.59, 2.45)            | 0.68 | 0.78    | 0.01          | -1.15 (-2.38, 0.08)           | 0.07 | 0.44    | <b>-2.18 (-3.93, -0.44)</b>   | 0.01 | 0.20    | 0.08 (-1.68, 1.84)            | 0.93 | 0.96    | 0.05          |
| <b>mNNIs</b>         |                               |       |         |                               |       |         |                               |      |         |               |                               |      |         |                               |      |         |                               |      |         |               |
| IMI                  | 0.33 (-1.04, 1.70)            | 0.64  | 0.73    | -0.59 (-2.65, 1.47)           | 0.58  | 0.71    | 1.13 (-0.66, 2.92)            | 0.22 | 0.77    | 0.21          | 0.27 (-0.83, 1.38)            | 0.63 | 0.73    | -0.35 (-1.93, 1.22)           | 0.66 | 0.77    | 0.97 (-0.60, 2.53)            | 0.22 | 0.40    | 0.29          |
| IMI-olefin           | 0.48 (-1.09, 2.05)            | 0.55  | 0.67    | -0.56 (-2.88, 1.75)           | 0.63  | 0.72    | 1.43 (-0.66, 3.52)            | 0.18 | 0.77    | 0.21          | 0.30 (-0.96, 1.56)            | 0.64 | 0.73    | -0.32 (-2.09, 1.45)           | 0.72 | 0.77    | 1.07 (-0.76, 2.90)            | 0.25 | 0.40    | 0.29          |
| 5-hydroxy-IMI        | 0.01 (-1.46, 1.49)            | 0.98  | 0.98    | -0.99 (-3.19, 1.21)           | 0.38  | 0.50    | 0.93 (-1.02, 2.88)            | 0.35 | 0.77    | 0.20          | 0.47 (-0.72, 1.65)            | 0.44 | 0.66    | 0.35 (-1.33, 2.03)            | 0.68 | 0.77    | 0.62 (-1.08, 2.32)            | 0.48 | 0.63    | 0.81          |
| DN-IMI               | -0.88 (-2.22, 0.46)           | 0.20  | 0.40    | -1.47 (-3.54, 0.60)           | 0.16  | 0.33    | -0.68 (-2.38, 1.03)           | 0.44 | 0.77    | 0.49          | 0.70 (-0.38, 1.78)            | 0.20 | 0.47    | 0.01 (-1.58, 1.59)            | 0.99 | 0.99    | 1.27 (-0.21, 2.76)            | 0.09 | 0.35    | 0.24          |
| DM-ACE               | -0.71 (-2.37, 0.95)           | 0.40  | 0.58    | -1.28 (-3.72, 1.17)           | 0.30  | 0.44    | 0.41 (-1.81, 2.63)            | 0.72 | 0.78    | 0.40          | -0.67 (-2.00, 0.67)           | 0.33 | 0.58    | -1.06 (-2.92, 0.81)           | 0.27 | 0.47    | 0.05 (-1.89, 1.99)            | 0.96 | 0.96    | 0.53          |
| THM                  | 0.12 (-1.10, 1.33)            | 0.85  | 0.91    | -0.33 (-2.17, 1.51)           | 0.72  | 0.77    | 0.66 (-0.92, 2.25)            | 0.41 | 0.77    | 0.48          | 0.65 (-0.33, 1.63)            | 0.19 | 0.47    | 0.28 (-1.13, 1.68)            | 0.70 | 0.77    | 1.13 (-0.26, 2.51)            | 0.11 | 0.35    | 0.49          |
| CLO                  | <b>1.54 (0.01, 3.07)</b>      | 0.05  | 0.19    | 1.27 (-1.08, 3.63)            | 0.29  | 0.44    | 1.90 (-0.06, 3.86)            | 0.06 | 0.77    | 0.82          | 1.01 (-0.23, 2.24)            | 0.11 | 0.44    | 0.76 (-1.04, 2.56)            | 0.40 | 0.59    | 1.24 (-0.47, 2.96)            | 0.16 | 0.40    | 0.80          |
| DM-CLO               | <b>1.77 (0.54, 3.01)</b>      | 0.005 | 0.08    | <b>2.47 (0.67, 4.28)</b>      | 0.01  | 0.04    | 0.95 (-0.71, 2.62)            | 0.26 | 0.77    | 0.12          | 0.87 (-0.13, 1.87)            | 0.09 | 0.44    | 1.43 (-0.01, 2.82)            | 0.06 | 0.20    | 0.17 (-1.29, 1.62)            | 0.82 | 0.94    | 0.18          |

Abbreviation: DMP, dimethyl phosphate; DMTP, dimethyl thiophosphate; DEP, diethyl phosphate; DETP, diethyl thiophosphate; TCPy, 3,5,6-trichloro-2-pyridinol; PNP, para-nitrophenol; 3-PBA, 3-phenoxybenzoic acid; trans-DCCA, trans-3-(2,2-dichlorovinyl)-2,2-dimethyl-cyclopropane-1-carboxylic acid; IMI, imidacloprid; IMI-olefin, imidacloprid-olefin; 5-hydroxy-IMI, 5-Hydroxy-imidacloprid; DN-IMI, desnitro-imidacloprid; DM-ACE, desmethyl-acetamidoprid; THM, thiamethoxam; CLO, clothianidin; DM-CLO, desmethyl-clothianidin.

<sup>a</sup> Multivariate linear regression (MLR) models, adjusted for maternal age (categorical), pre-pregnancy BMI (categorical), maternal education (categorical), passive smoking (categorical), folic acid supplement during pregnancy (categorical), parity (categorical), child sex (categorical), breastfeeding duration (categorical), and delivery mode (categorical). <sup>b</sup> Stratified analyses were adjusted for all the mentioned confounders except infant sex.  $P$ :  $P$  values before performing multiple comparison corrections, which were derived from MLR models (including the major analyses and sex-stratified analyses).  $P-FDR$ : false discovery rate (FDR)-corrected  $P$  values for multiple comparisons.  $P_{sex-int}$  for the interaction term between prenatal insecticide exposures and child sex, which were derived from sex-interaction analyses.  $P < 0.05$ ,  $P-FDR < 0.05$ ,  $P_{sex-int} < 0.05$  were considered statistically significant.

**Table S8.** Generalized estimating equation model evaluating trimester-specific associations between SG-adjusted maternal urinary analytes concentrations (ln-transformed, ng/mL) with children's MDI and PDI scores at two years of age in participants from a birth cohort study in Wuhan, China, 2014–2017 ( $N = 1041$  participants,  $n = 1041$  samples for 1st trimester,  $n = 1041$  samples for 2nd trimester,  $n = 1041$  samples for 3rd trimester, data correspond to Figure 2).

| Compounds<br>(ng/mL) | MDI                           |      |         |                               |      |             |                               |      |         |               | PDI                           |       |             |                               |      |         |                               |       |             |               |
|----------------------|-------------------------------|------|---------|-------------------------------|------|-------------|-------------------------------|------|---------|---------------|-------------------------------|-------|-------------|-------------------------------|------|---------|-------------------------------|-------|-------------|---------------|
|                      | All ( $n = 1041$ )            |      |         | Male ( $n = 553$ )            |      |             | Female ( $n = 488$ )          |      |         | $P_{sex-int}$ | All ( $n = 1041$ )            |       |             | Male ( $n = 553$ )            |      |         | Female ( $n = 488$ )          |       |             | $P_{sex-int}$ |
|                      | $\beta$ (95% CI) <sup>a</sup> | $P$  | $P-FDR$ | $\beta$ (95% CI) <sup>b</sup> | $P$  | $P-FDR$     | $\beta$ (95% CI) <sup>b</sup> | $P$  | $P-FDR$ |               | $\beta$ (95% CI) <sup>a</sup> | $P$   | $P-FDR$     | $\beta$ (95% CI) <sup>b</sup> | $P$  | $P-FDR$ | $\beta$ (95% CI) <sup>b</sup> | $P$   | $P-FDR$     |               |
| <b>mOPPs</b>         |                               |      |         |                               |      |             |                               |      |         |               |                               |       |             |                               |      |         |                               |       |             |               |
| <b>DEP</b>           |                               |      |         |                               |      |             |                               |      |         |               |                               |       |             |                               |      |         |                               |       |             |               |
| 1st trimester        | -1.00 (-2.52, 0.52)           | 0.20 | 0.39    | -2.05 (-4.23, 0.14)           | 0.07 | 0.15        | 0.51 (-1.55, 2.58)            | 0.63 | 0.98    | 0.06          | -0.26 (-1.48, 0.96)           | 0.68  | 0.90        | -0.67 (-2.34, 1.01)           | 0.43 | 0.61    | 0.83 (-0.97, 2.63)            | 0.37  | 0.67        | 0.07          |
| 2nd trimester        | -0.98 (-2.57, 0.61)           | 0.23 | 0.69    | -2.29 (-4.59, 0.01)           | 0.05 | 0.35        | 0.16 (-1.98, 2.30)            | 0.88 | 0.98    | 0.06          | 0.24 (-1.04, 1.52)            | 0.71  | 0.90        | -1.17 (-2.93, 0.58)           | 0.19 | 0.61    | 1.87 (-0.001, 3.74)           | 0.05  | 0.51        | 0.02          |
| 3rd trimester        | -0.23 (-1.75, 1.30)           | 0.77 | 0.99    | -0.47 (-2.69, 1.75)           | 0.68 | 0.74        | 0.27 (-1.76, 2.30)            | 0.79 | 0.90    | 0.18          | -0.39 (-1.61, 0.84)           | 0.54  | 0.57        | -0.82 (-2.52, 0.88)           | 0.34 | 0.68    | 0.34 (-1.43, 2.11)            | 0.71  | 0.71        | 0.09          |
| <b>DMP</b>           |                               |      |         |                               |      |             |                               |      |         |               |                               |       |             |                               |      |         |                               |       |             |               |
| 1st trimester        | -0.03 (-1.47, 1.41)           | 0.97 | 0.97    | -0.77 (-2.92, 1.38)           | 0.48 | 0.64        | 0.79 (-1.09, 2.67)            | 0.41 | 0.95    | 0.28          | 0.61 (-0.55, 1.77)            | 0.31  | 0.56        | 0.24 (-1.40, 1.89)            | 0.77 | 0.82    | 1.19 (-0.44, 2.82)            | 0.15  | 0.49        | 0.16          |
| 2nd trimester        | 1.31 (-0.14, 2.77)            | 0.08 | 0.41    | 0.85 (-1.25, 2.96)            | 0.43 | 0.51        | 1.73 (-0.22, 3.68)            | 0.08 | 0.76    | 0.34          | 0.71 (-0.46, 1.88)            | 0.24  | 0.90        | 0.24 (-1.37, 1.85)            | 0.77 | 0.96    | 1.45 (-0.25, 3.14)            | 0.09  | 0.51        | 0.12          |
| 3rd trimester        | 0.56 (-0.82, 1.95)            | 0.43 | 0.85    | 0.34 (-1.63, 2.32)            | 0.73 | 0.74        | 0.92 (-0.98, 2.83)            | 0.34 | 0.51    | 0.42          | <b>1.72 (0.60, 2.83)</b>      | 0.003 | <b>0.04</b> | 1.03 (-0.48, 2.54)            | 0.18 | 0.68    | <b>2.56 (0.91, 4.22)</b>      | 0.002 | <b>0.04</b> | 0.09          |
| <b>DETP</b>          |                               |      |         |                               |      |             |                               |      |         |               |                               |       |             |                               |      |         |                               |       |             |               |
| 1st trimester        | -1.00 (-2.30, 0.30)           | 0.13 | 0.35    | -1.66 (-3.57, 0.26)           | 0.09 | 0.16        | 0.02 (-1.69, 1.73)            | 0.98 | 0.98    | 0.22          | -0.57 (-1.61, 0.48)           | 0.29  | 0.56        | -1.32 (-2.79, 0.14)           | 0.08 | 0.24    | 0.60 (-0.89, 2.09)            | 0.43  | 0.68        | 0.12          |
| 2nd trimester        | -0.29 (-1.56, 0.99)           | 0.66 | 0.99    | -0.77 (-2.66, 1.12)           | 0.42 | 0.51        | -0.01 (-1.67, 1.66)           | 1.00 | 1.00    | 0.48          | -0.41 (-1.44, 0.61)           | 0.43  | 0.90        | -1.45 (-2.89, 0.00)           | 0.05 | 0.39    | 0.74 (-0.71, 2.20)            | 0.32  | 0.65        | 0.04          |
| 3rd trimester        | 0.05 (-1.17, 1.27)            | 0.93 | 0.99    | -0.87 (-2.72, 0.99)           | 0.36 | 0.66        | 0.69 (-0.86, 2.25)            | 0.38 | 0.51    | 0.24          | 0.21 (-0.77, 1.19)            | 0.68  | 0.68        | -0.39 (-1.80, 1.02)           | 0.59 | 0.68    | 0.76 (-0.60, 2.12)            | 0.27  | 0.43        | 0.30          |
| <b>DMTP</b>          |                               |      |         |                               |      |             |                               |      |         |               |                               |       |             |                               |      |         |                               |       |             |               |
| 1st trimester        | -0.63 (-1.84, 0.58)           | 0.30 | 0.44    | -0.67 (-2.49, 1.15)           | 0.47 | 0.64        | -0.50 (-2.06, 1.07)           | 0.53 | 0.95    | 0.57          | -0.13 (-1.10, 0.84)           | 0.79  | 0.91        | -0.65 (-2.04, 0.73)           | 0.36 | 0.57    | 0.61 (-0.75, 1.98)            | 0.38  | 0.67        | 0.12          |
| 2nd trimester        | 0.04 (-1.12, 1.21)            | 0.94 | 0.99    | -0.98 (-2.78, 0.83)           | 0.29 | 0.51        | 0.79 (-0.66, 2.24)            | 0.29 | 0.76    | 0.10          | -0.42 (-1.35, 0.52)           | 0.38  | 0.90        | <b>-1.49 (-2.86, -0.11)</b>   | 0.03 | 0.39    | 0.54 (-0.72, 1.80)            | 0.40  | 0.71        | 0.03          |
| 3rd trimester        | 0.00 (-1.21, 1.21)            | 0.99 | 0.99    | -0.64 (-2.44, 1.16)           | 0.48 | 0.66        | 0.81 (-0.77, 2.38)            | 0.31 | 0.51    | 0.22          | 0.50 (-0.48, 1.47)            | 0.32  | 0.40        | -0.37 (-1.74, 1.00)           | 0.60 | 0.68    | <b>1.44 (0.07, 2.82)</b>      | 0.04  | 0.29        | 0.07          |
| <b>TCPy</b>          |                               |      |         |                               |      |             |                               |      |         |               |                               |       |             |                               |      |         |                               |       |             |               |
| 1st trimester        | <b>-1.96 (-3.66, -0.26)</b>   | 0.02 | 0.13    | <b>-3.16 (-5.59, -0.74)</b>   | 0.01 | <b>0.04</b> | -0.06 (-2.39, 2.27)           | 0.96 | 0.98    | 0.07          | -0.71 (-2.08, 0.66)           | 0.31  | 0.56        | -1.69 (-3.54, 0.17)           | 0.07 | 0.24    | 1.10 (-0.93, 3.14)            | 0.29  | 0.66        | 0.07          |
| 2nd trimester        | 0.01 (-1.64, 1.66)            | 0.99 | 0.99    | -1.09 (-3.49, 1.30)           | 0.37 | 0.51        | 1.33 (-0.88, 3.54)            | 0.24 | 0.76    | 0.14          | 0.49 (-0.84, 1.82)            | 0.47  | 0.90        | -0.43 (-2.26, 1.40)           | 0.65 | 0.94    | 1.76 (-0.17, 3.69)            | 0.07  | 0.51        | 0.09          |
| 3rd trimester        | 0.06 (-1.27, 1.38)            | 0.93 | 0.99    | -0.46 (-2.42, 1.50)           | 0.65 | 0.74        | 0.84 (-0.90, 2.58)            | 0.34 | 0.51    | 0.50          | 0.54 (-0.53, 1.60)            | 0.33  | 0.40        | 0.49 (-1.01, 1.99)            | 0.52 | 0.68    | 0.77 (-0.75, 2.28)            | 0.32  | 0.43        | 0.95          |
| <b>PNP</b>           |                               |      |         |                               |      |             |                               |      |         |               |                               |       |             |                               |      |         |                               |       |             |               |
| 1st trimester        | -1.61 (-3.23, 0.01)           | 0.05 | 0.18    | <b>-3.06 (-5.45, -0.68)</b>   | 0.01 | <b>0.04</b> | 0.10 (-2.05, 2.24)            | 0.93 | 0.98    | <b>0.05</b>   | -0.20 (-1.51, 1.11)           | 0.77  | 0.91        | -1.55 (-3.37, 0.27)           | 0.10 | 0.25    | 1.66 (-0.20, 3.53)            | 0.08  | 0.49        | 0.02          |
| 2nd trimester        | -0.54 (-2.20, 1.11)           | 0.52 | 0.99    | -1.39 (-3.92, 1.13)           | 0.28 | 0.51        | 0.11 (-2.00, 2.22)            | 0.92 | 0.98    | 0.21          | 0.10 (-1.24, 1.43)            | 0.89  | 0.90        | -1.11 (-3.04, 0.82)           | 0.26 | 0.65    | 1.40 (-0.44, 3.24)            | 0.14  | 0.54        | 0.03          |
| 3rd trimester        | -1.65 (-3.29, 0.00)           | 0.05 | 0.23    | -2.19 (-4.58, 0.20)           | 0.07 | 0.58        | -1.10 (-3.21, 1.02)           | 0.31 | 0.51    | 0.41          | 1.03 (-0.27, 2.34)            | 0.12  | 0.27        | 0.85 (-0.98, 2.68)            | 0.36 | 0.68    | 1.40 (-0.44, 3.24)            | 0.14  | 0.31        | 0.45          |

| Compounds<br>(ng/mL) | MDI                           |          |                       |                               |          |                       |                               |          |                       |                               | PDI                         |                |                       |                               |                |                       |                               |                  |                       |      |  |                             |
|----------------------|-------------------------------|----------|-----------------------|-------------------------------|----------|-----------------------|-------------------------------|----------|-----------------------|-------------------------------|-----------------------------|----------------|-----------------------|-------------------------------|----------------|-----------------------|-------------------------------|------------------|-----------------------|------|--|-----------------------------|
|                      | All (n = 1041)                |          |                       | Male (n = 553)                |          |                       | Female (n = 488)              |          |                       |                               | <i>P</i> <sub>sex-int</sub> | All (n = 1041) |                       |                               | Male (n = 553) |                       |                               | Female (n = 488) |                       |      |  | <i>P</i> <sub>sex-int</sub> |
|                      | $\beta$ (95% CI) <sup>a</sup> | <i>P</i> | <i>P</i> - <i>FDR</i> | $\beta$ (95% CI) <sup>b</sup> | <i>P</i> | <i>P</i> - <i>FDR</i> | $\beta$ (95% CI) <sup>b</sup> | <i>P</i> | <i>P</i> - <i>FDR</i> | $\beta$ (95% CI) <sup>a</sup> |                             | <i>P</i>       | <i>P</i> - <i>FDR</i> | $\beta$ (95% CI) <sup>b</sup> | <i>P</i>       | <i>P</i> - <i>FDR</i> | $\beta$ (95% CI) <sup>b</sup> | <i>P</i>         | <i>P</i> - <i>FDR</i> |      |  |                             |
| <b>mPYR</b>          |                               |          |                       |                               |          |                       |                               |          |                       |                               |                             |                |                       |                               |                |                       |                               |                  |                       |      |  |                             |
| <b>3-PBA</b>         |                               |          |                       |                               |          |                       |                               |          |                       |                               |                             |                |                       |                               |                |                       |                               |                  |                       |      |  |                             |
| 1st trimester        | -0.82 (-2.05, 0.41)           | 0.19     | 0.39                  | -1.70 (-3.47, 0.07)           | 0.06     | 0.15                  | 0.57 (-1.09, 2.23)            | 0.50     | 0.95                  | 0.13                          | -0.50 (-1.49, 0.49)         | 0.32           | 0.56                  | <b>-1.55 (-2.90, -0.20)</b>   | 0.02           | 0.20                  | 1.11 (-0.34, 2.56)            | 0.13             | 0.49                  | 0.06 |  |                             |
| 2nd trimester        | -0.12 (-1.31, 1.06)           | 0.84     | 0.99                  | 0.06 (-1.75, 1.87)            | 0.95     | 0.95                  | -0.33 (-1.82, 1.17)           | 0.67     | 0.92                  | 0.49                          | -0.17 (-1.12, 0.78)         | 0.72           | 0.90                  | -0.12 (-1.50, 1.26)           | 0.86           | 0.96                  | -0.11 (-1.42, 1.20)           | 0.87             | 0.98                  | 0.38 |  |                             |
| 3rd trimester        | 0.24 (-0.75, 1.22)            | 0.64     | 0.99                  | -0.25 (-1.72, 1.22)           | 0.74     | 0.74                  | 0.82 (-0.45, 2.10)            | 0.20     | 0.51                  | 0.29                          | <b>0.97 (0.18, 1.76)</b>    | 0.02           | 0.13                  | 1.18 (0.00, 2.36)             | 0.05           | 0.63                  | 0.77 (-0.34, 1.88)            | 0.17             | 0.31                  | 0.52 |  |                             |
| <b>trans-DCCA</b>    |                               |          |                       |                               |          |                       |                               |          |                       |                               |                             |                |                       |                               |                |                       |                               |                  |                       |      |  |                             |
| 1st trimester        | <b>-1.43 (-2.57, -0.30)</b>   | 0.01     | 0.11                  | <b>-2.24 (-3.89, -0.58)</b>   | 0.008    | <b>0.04</b>           | -0.30 (-1.81, 1.22)           | 0.70     | 0.98                  | 0.04                          | <b>-1.11 (-2.03, -0.20)</b> | 0.02           | 0.28                  | <b>-1.90 (-3.16, -0.64)</b>   | 0.003          | <b>0.05</b>           | 0.00 (-1.33, 1.32)            | 1.00             | 1.00                  | 0.02 |  |                             |
| 2nd trimester        | -0.67 (-1.83, 0.49)           | 0.26     | 0.69                  | -1.66 (-3.43, 0.10)           | 0.06     | 0.35                  | 0.30 (-1.17, 1.78)            | 0.69     | 0.92                  | 0.06                          | -0.56 (-1.50, 0.37)         | 0.24           | 0.90                  | -1.20 (-2.55, 0.15)           | 0.08           | 0.44                  | 0.13 (-1.16, 1.42)            | 0.85             | 0.98                  | 0.06 |  |                             |
| 3rd trimester        | -0.64 (-1.73, 0.44)           | 0.25     | 0.56                  | -1.11 (-2.66, 0.45)           | 0.16     | 0.58                  | -0.03 (-1.51, 1.46)           | 0.97     | 0.99                  | 0.13                          | 0.53 (-0.35, 1.40)          | 0.24           | 0.35                  | 0.42 (-0.77, 1.61)            | 0.49           | 0.68                  | 0.67 (-0.62, 1.97)            | 0.31             | 0.43                  | 0.18 |  |                             |
| <b>mNNIs</b>         |                               |          |                       |                               |          |                       |                               |          |                       |                               |                             |                |                       |                               |                |                       |                               |                  |                       |      |  |                             |
| <b>IMI</b>           |                               |          |                       |                               |          |                       |                               |          |                       |                               |                             |                |                       |                               |                |                       |                               |                  |                       |      |  |                             |
| 1st trimester        | 0.30 (-0.72, 1.32)            | 0.56     | 0.6                   | 0.43 (-1.11, 1.97)            | 0.58     | 0.72                  | 0.11 (-1.19, 1.40)            | 0.87     | 0.98                  | 0.33                          | 0.00 (-0.81, 0.82)          | 0.99           | 0.99                  | -0.28 (-1.45, 0.90)           | 0.64           | 0.73                  | 0.27 (-0.86, 1.40)            | 0.64             | 0.74                  | 0.28 |  |                             |
| 2nd trimester        | -0.03 (-1.11, 1.05)           | 0.95     | 0.99                  | -0.64 (-2.22, 0.94)           | 0.43     | 0.51                  | 0.62 (-0.81, 2.05)            | 0.40     | 0.76                  | 0.22                          | 0.18 (-0.69, 1.05)          | 0.68           | 0.90                  | 0.03 (-1.17, 1.24)            | 0.96           | 0.96                  | 0.45 (-0.80, 1.70)            | 0.48             | 0.77                  | 0.32 |  |                             |
| 3rd trimester        | 0.10 (-0.94, 1.15)            | 0.84     | 0.99                  | -0.83 (-2.40, 0.75)           | 0.30     | 0.66                  | 0.89 (-0.46, 2.24)            | 0.20     | 0.51                  | 0.21                          | 0.40 (-0.45, 1.24)          | 0.36           | 0.41                  | -0.21 (-1.41, 0.99)           | 0.73           | 0.78                  | 1.02 (-0.16, 2.20)            | 0.09             | 0.29                  | 0.23 |  |                             |
| <b>IMI-olefin</b>    |                               |          |                       |                               |          |                       |                               |          |                       |                               |                             |                |                       |                               |                |                       |                               |                  |                       |      |  |                             |
| 1st trimester        | 0.44 (-0.75, 1.63)            | 0.47     | 0.54                  | 0.17 (-1.61, 1.94)            | 0.86     | 0.91                  | 0.66 (-0.88, 2.20)            | 0.40     | 0.95                  | 0.49                          | 0.42 (-0.54, 1.38)          | 0.39           | 0.56                  | 0.07 (-1.28, 1.43)            | 0.91           | 0.91                  | 0.88 (-0.47, 2.22)            | 0.20             | 0.54                  | 0.36 |  |                             |
| 2nd trimester        | 0.18 (-1.01, 1.37)            | 0.77     | 0.99                  | -0.69 (-2.48, 1.09)           | 0.45     | 0.51                  | 1.01 (-0.54, 2.55)            | 0.20     | 0.76                  | 0.18                          | 0.06 (-0.90, 1.02)          | 0.90           | 0.90                  | -0.43 (-1.79, 0.93)           | 0.54           | 0.94                  | 0.68 (-0.67, 2.03)            | 0.32             | 0.65                  | 0.27 |  |                             |
| 3rd trimester        | 0.04 (-1.05, 1.12)            | 0.95     | 0.99                  | -0.55 (-2.12, 1.03)           | 0.50     | 0.66                  | 0.53 (-0.93, 1.99)            | 0.47     | 0.58                  | 0.41                          | 0.74 (-0.13, 1.62)          | 0.10           | 0.27                  | 0.42 (-0.78, 1.62)            | 0.49           | 0.68                  | 1.11 (-0.16, 2.38)            | 0.09             | 0.29                  | 0.43 |  |                             |
| <b>5-hydroxy-IMI</b> |                               |          |                       |                               |          |                       |                               |          |                       |                               |                             |                |                       |                               |                |                       |                               |                  |                       |      |  |                             |
| 1st trimester        | 0.43 (-0.66, 1.52)            | 0.44     | 0.54                  | 0.29 (-1.30, 1.88)            | 0.72     | 0.82                  | 0.57 (-0.88, 2.03)            | 0.44     | 0.95                  | 0.81                          | 0.40 (-0.48, 1.28)          | 0.37           | 0.56                  | 0.42 (-0.79, 1.63)            | 0.50           | 0.61                  | 0.47 (-0.80, 1.74)            | 0.47             | 0.68                  | 0.97 |  |                             |
| 2nd trimester        | 0.17 (-0.94, 1.29)            | 0.76     | 0.99                  | -0.90 (-2.58, 0.78)           | 0.29     | 0.51                  | 1.20 (-0.24, 2.64)            | 0.10     | 0.76                  | 0.06                          | 0.11 (-0.78, 1.01)          | 0.80           | 0.90                  | -0.38 (-1.67, 0.90)           | 0.56           | 0.94                  | 0.72 (-0.54, 1.98)            | 0.26             | 0.65                  | 0.20 |  |                             |
| 3rd trimester        | -0.24 (-1.30, 0.81)           | 0.65     | 0.99                  | -0.67 (-2.21, 0.87)           | 0.39     | 0.66                  | 0.01 (-1.39, 1.42)            | 0.99     | 0.99                  | 0.64                          | 0.76 (-0.09, 1.61)          | 0.08           | 0.27                  | 0.64 (-0.53, 1.82)            | 0.28           | 0.68                  | 0.86 (-0.37, 2.08)            | 0.17             | 0.31                  | 0.88 |  |                             |
| <b>DN-IMI</b>        |                               |          |                       |                               |          |                       |                               |          |                       |                               |                             |                |                       |                               |                |                       |                               |                  |                       |      |  |                             |
| 1st trimester        | -0.66 (-1.81, 0.48)           | 0.26     | 0.41                  | -1.51 (-3.21, 0.19)           | 0.08     | 0.16                  | 0.08 (-1.42, 1.57)            | 0.92     | 0.98                  | 0.13                          | 0.07 (-0.85, 0.99)          | 0.88           | 0.94                  | -0.77 (-2.07, 0.53)           | 0.24           | 0.56                  | 0.96 (-0.35, 2.26)            | 0.15             | 0.49                  | 0.07 |  |                             |
| 2nd trimester        | -0.33 (-1.50, 0.84)           | 0.58     | 0.99                  | -1.21 (-3.02, 0.59)           | 0.19     | 0.51                  | 0.35 (-1.11, 1.82)            | 0.64     | 0.92                  | 0.17                          | 0.07 (-0.88, 1.01)          | 0.89           | 0.90                  | 0.16 (-1.22, 1.54)            | 0.82           | 0.96                  | -0.02 (-1.30, 1.26)           | 0.98             | 0.98                  | 0.26 |  |                             |
| 3rd trimester        | -0.70 (-1.86, 0.45)           | 0.23     | 0.56                  | -0.63 (-2.40, 1.14)           | 0.49     | 0.66                  | -1.00 (-2.46, 0.46)           | 0.18     | 0.51                  | 0.40                          | 0.69 (-0.25, 1.62)          | 0.15           | 0.27                  | 0.04 (-1.32, 1.39)            | 0.96           | 0.96                  | 1.22 (-0.06, 2.49)            | 0.06             | 0.29                  | 0.13 |  |                             |

| Compounds<br>(ng/mL) | MDI                           |          |              |                               |          |              |                               |          |              |                               | PDI                 |                |              |                               |                |              |                               |                  |              |      |  |               |
|----------------------|-------------------------------|----------|--------------|-------------------------------|----------|--------------|-------------------------------|----------|--------------|-------------------------------|---------------------|----------------|--------------|-------------------------------|----------------|--------------|-------------------------------|------------------|--------------|------|--|---------------|
|                      | All (n = 1041)                |          |              | Male (n = 553)                |          |              | Female (n = 488)              |          |              |                               | $P_{sex-int}$       | All (n = 1041) |              |                               | Male (n = 553) |              |                               | Female (n = 488) |              |      |  | $P_{sex-int}$ |
|                      | $\beta$ (95% CI) <sup>a</sup> | <i>P</i> | <i>P-FDR</i> | $\beta$ (95% CI) <sup>b</sup> | <i>P</i> | <i>P-FDR</i> | $\beta$ (95% CI) <sup>b</sup> | <i>P</i> | <i>P-FDR</i> | $\beta$ (95% CI) <sup>a</sup> |                     | <i>P</i>       | <i>P-FDR</i> | $\beta$ (95% CI) <sup>b</sup> | <i>P</i>       | <i>P-FDR</i> | $\beta$ (95% CI) <sup>b</sup> | <i>P</i>         | <i>P-FDR</i> |      |  |               |
| <b>DM-ACE</b>        |                               |          |              |                               |          |              |                               |          |              |                               |                     |                |              |                               |                |              |                               |                  |              |      |  |               |
| 1st trimester        | -1.20 (-2.44, 0.03)           | 0.06     | 0.18         | -1.37 (-3.18, 0.44)           | 0.14     | 0.22         | -0.69 (-2.32, 0.95)           | 0.41     | 0.95         | 0.64                          | -0.53 (-1.53, 0.46) | 0.29           | 0.56         | -0.51 (-1.89, 0.88)           | 0.47           | 0.61         | -0.34 (-1.77, 1.09)           | 0.64             | 0.74         | 0.99 |  |               |
| 2nd trimester        | -0.48 (-1.70, 0.74)           | 0.44     | 0.99         | -0.30 (-2.10, 1.50)           | 0.74     | 0.79         | -0.65 (-2.24, 0.95)           | 0.43     | 0.76         | 0.91                          | -0.54 (-1.52, 0.44) | 0.28           | 0.90         | -0.75 (-2.13, 0.62)           | 0.28           | 0.65         | -0.16 (-1.55, 1.24)           | 0.83             | 0.98         | 0.52 |  |               |
| 3rd trimester        | 1.14 (-0.04, 2.31)            | 0.06     | 0.23         | 1.04 (-0.67, 2.76)            | 0.23     | 0.62         | 1.42 (-0.15, 2.98)            | 0.08     | 0.51         | 0.86                          | 0.73 (-0.21, 1.68)  | 0.13           | 0.27         | 0.45 (-0.86, 1.77)            | 0.50           | 0.68         | 1.09 (-0.28, 2.45)            | 0.12             | 0.31         | 0.58 |  |               |
| <b>THM</b>           |                               |          |              |                               |          |              |                               |          |              |                               |                     |                |              |                               |                |              |                               |                  |              |      |  |               |
| 1st trimester        | -0.58 (-1.51, 0.36)           | 0.23     | 0.41         | <b>-1.53 (-2.92, -0.13)</b>   | 0.03     | 0.10         | 0.45 (-0.78, 1.67)            | 0.47     | 0.95         | 0.29                          | 0.33 (-0.42, 1.09)  | 0.39           | 0.56         | 0.50 (-0.57, 1.57)            | 0.36           | 0.57         | 0.25 (-0.82, 1.32)            | 0.65             | 0.74         | 0.96 |  |               |
| 2nd trimester        | 0.81 (-0.20, 1.82)            | 0.12     | 0.47         | 0.98 (-0.54, 2.50)            | 0.21     | 0.51         | 0.55 (-0.75, 1.85)            | 0.41     | 0.76         | 0.80                          | 0.19 (-0.63, 1.00)  | 0.65           | 0.90         | -0.31 (-1.47, 0.85)           | 0.60           | 0.94         | 0.69 (-0.44, 1.83)            | 0.23             | 0.65         | 0.62 |  |               |
| 3rd trimester        | 0.76 (-0.19, 1.71)            | 0.12     | 0.37         | 1.03 (-0.45, 2.51)            | 0.17     | 0.58         | 0.55 (-0.64, 1.75)            | 0.37     | 0.51         | 0.80                          | 0.48 (-0.28, 1.25)  | 0.22           | 0.35         | 0.54 (-0.59, 1.68)            | 0.35           | 0.68         | 0.44 (-0.60, 1.49)            | 0.41             | 0.47         | 0.90 |  |               |
| <b>CLO</b>           |                               |          |              |                               |          |              |                               |          |              |                               |                     |                |              |                               |                |              |                               |                  |              |      |  |               |
| 1st trimester        | 0.55 (-0.60, 1.71)            | 0.35     | 0.46         | -0.02 (-1.73, 1.69)           | 0.98     | 0.98         | 1.29 (-0.22, 2.79)            | 0.09     | 0.95         | 0.62                          | 0.88 (-0.05, 1.81)  | 0.06           | 0.38         | 0.64 (-0.67, 1.95)            | 0.34           | 0.57         | 1.14 (-0.18, 2.45)            | 0.09             | 0.49         | 0.80 |  |               |
| 2nd trimester        | <b>1.20 (0.02, 2.38)</b>      | 0.05     | 0.39         | 1.21 (-0.55, 2.97)            | 0.18     | 0.51         | 1.02 (-0.52, 2.55)            | 0.19     | 0.76         | 0.94                          | 0.14 (-0.81, 1.09)  | 0.77           | 0.90         | -0.05 (-1.39, 1.30)           | 0.95           | 0.96         | 0.20 (-1.14, 1.54)            | 0.77             | 0.98         | 0.91 |  |               |
| 3rd trimester        | <b>1.29 (0.18, 2.41)</b>      | 0.02     | 0.23         | 1.54 (-0.21, 3.29)            | 0.08     | 0.58         | 1.12 (-0.28, 2.51)            | 0.12     | 0.51         | 0.99                          | 0.66 (-0.24, 1.56)  | 0.15           | 0.27         | 0.95 (-0.39, 2.29)            | 0.16           | 0.68         | 0.46 (-0.75, 1.68)            | 0.45             | 0.48         | 0.98 |  |               |
| <b>DM-CLO</b>        |                               |          |              |                               |          |              |                               |          |              |                               |                     |                |              |                               |                |              |                               |                  |              |      |  |               |
| 1st trimester        | <b>1.22 (0.32, 2.12)</b>      | 0.01     | 0.11         | <b>1.70 (0.40, 3.00)</b>      | 0.01     | <b>0.04</b>  | 0.52 (-0.69, 1.74)            | 0.40     | 0.95         | 0.10                          | 0.67 (-0.06, 1.40)  | 0.07           | 0.38         | <b>1.05 (0.06, 2.05)</b>      | 0.04           | 0.20         | 0.11 (-0.95, 1.17)            | 0.85             | 0.90         | 0.19 |  |               |
| 2nd trimester        | 0.83 (-0.001, 1.66)           | 0.05     | 0.39         | <b>1.57 (0.33, 2.80)</b>      | 0.01     | 0.21         | 0.05 (-1.01, 1.12)            | 0.92     | 0.98         | 0.06                          | 0.35 (-0.32, 1.01)  | 0.31           | 0.90         | 0.67 (-0.28, 1.62)            | 0.17           | 0.61         | 0.01 (-0.92, 0.95)            | 0.98             | 0.98         | 0.28 |  |               |
| 3rd trimester        | <b>1.01 (0.10, 1.92)</b>      | 0.03     | 0.23         | 0.89 (-0.41, 2.20)            | 0.18     | 0.58         | 1.17 (-0.06, 2.41)            | 0.06     | 0.51         | 0.53                          | 0.56 (-0.17, 1.29)  | 0.13           | 0.27         | 0.64 (-0.36, 1.64)            | 0.21           | 0.68         | 0.49 (-0.59, 1.57)            | 0.38             | 0.46         | 0.58 |  |               |

Abbreviation: DMP, dimethyl phosphate; DMTP, dimethyl thiophosphate; DEP, diethyl phosphate; DETP, diethyl thiophosphate; TCPy, 3,5,6-trichloro-2-pyridinol; PNP, para-nitrophenol; 3-PBA, 3-phenoxybenzoic acid; trans-DCCA, trans-3-(2,2-dichlorovinyl)-2,2-dimethyl-cyclopropane-1-carboxylic acid; IMI, imidacloprid; IMI-olefin, imidacloprid-olefin; 5-hydroxy-IMI, 5-Hydroxy-imidacloprid; DN-IMI, desnitro-imidacloprid; DM-ACE, desmethyl-acetamiprid; THM, thiamethoxam; CLO, clothianidin; DM-CLO, desmethyl-clothianidin.

<sup>a</sup> Generalized estimating equation (GEE) models were adjusted for maternal age (categorical), pre-pregnancy BMI (categorical), maternal education (categorical), passive smoking (categorical), folic acid supplement during pregnancy (categorical), parity (categorical), child sex (categorical), breastfeeding duration (categorical), delivery mode (categorical), and sampling seasons (categorical).

<sup>b</sup> sex-stratified analyses were adjusted for all the mentioned confounders except child sex.

*p*: *p* values before performing multiple comparison corrections, which were derived from GEE models (including the major analyses and sex-stratified analyses).

*p<sub>FDR</sub>*: false discovery rate (FDR)-corrected *p* values for multiple comparisons.

*p<sub>sex-int</sub>* for the interaction term between prenatal insecticide exposures and child sex, which were derived from sex-interaction analyses.

*p* < 0.05, *p<sub>FDR</sub>* < 0.05, *p<sub>sex-int</sub>* < 0.05 were considered statistically significant.

**Table S9.** Weighted quantile sum regression (WQSR) analysis<sup>a</sup> for the associations of weighted quantile sum regression index of pesticide biomarkers [based on the concentrations in the 1st trimester ( $N = 553$  participants,  $n = 553$  samples) and the averaged concentrations over the three trimesters ( $N = 553$  participants,  $n = 1659$  samples)] with boy's MDI scores estimated in the repeated holdout validation<sup>b</sup> in participants from a birth cohort study in Wuhan, China, 2014–2017 (Data correspond to Figure 3).

| Compounds<br>(ng/mL)                        | Average trimester                      | Compounds<br>(ng/mL)                        | 1st trimester                          |
|---------------------------------------------|----------------------------------------|---------------------------------------------|----------------------------------------|
|                                             | Negative association with<br>WQS index |                                             | Negative association with<br>WQS index |
| <b>WQS unit <math>\beta</math> (95% CI)</b> | <b>-2.80 (-4.96, -0.64)</b>            | <b>WQS unit <math>\beta</math> (95% CI)</b> | <b>-3.02 (-5.47, -0.57)</b>            |
| <b><i>p</i>-value</b>                       | 0.006                                  | <b><i>p</i>-value</b>                       | 0.01                                   |
|                                             | Average weight                         |                                             | Average weight                         |
| TCPy                                        | 0.282                                  | trans-DCCA                                  | 0.182                                  |
| trans-DCCA                                  | 0.120                                  | THM                                         | 0.165                                  |
| PNP                                         | 0.117                                  | TCPy                                        | 0.126                                  |
| DEP                                         | 0.101                                  | DN-IMI                                      | 0.121                                  |
| 3-PBA                                       | 0.094                                  | PNP                                         | 0.096                                  |
| DMTP                                        | 0.064                                  | DEP                                         | 0.070                                  |
| THM                                         | 0.046                                  | 3-PBA                                       | 0.065                                  |
| DN-IMI                                      | 0.040                                  | DMTP                                        | 0.057                                  |
| DETP                                        | 0.037                                  | DETP                                        | 0.051                                  |
| IMI                                         | 0.035                                  | DM-ACE                                      | 0.040                                  |
| DM-ACE                                      | 0.030                                  | CLO                                         | 0.017                                  |
| IMI-olefin                                  | 0.016                                  | DMP                                         | 0.012                                  |
| 5-hydroxy-IMI                               | 0.016                                  |                                             |                                        |

<sup>a</sup> WQSR analysis was conducted in negative direction according to the results from MLR and GEE models. Models were adjusted for maternal age (categorical), pre-pregnancy BMI (categorical), maternal education (categorical), passive smoking (categorical), folic acid supplement during pregnancy (categorical), parity (categorical), and breastfeeding duration (categorical), delivery mode (categorical), and sampling seasons (except for average trimesters, categorical).<sup>b</sup> The repeated holdout validation was used, basing on the mean of 100 repeated holdouts on 40/60% training/testing splits.  $p$ -value < 0.05 was considered statistically significant, which were derived from WQSR analysis.

**Table S10.** Weighted quantile sum regression (WQSR) analysis<sup>a</sup> for the associations of weighted quantile sum regression index of pesticide biomarkers [based on the concentrations in the 1st trimester ( $N = 553$  participants,  $n = 553$  samples) and the averaged concentrations over the three trimesters ( $N = 553$  participants,  $n = 1659$  samples)] with boy's PDI scores ( $n = 553$ ) estimated in the repeated holdout validation<sup>b</sup> in participants from a birth cohort study in Wuhan, China, 2014–2017.

| Compounds<br>(ng/mL)                        | Average trimester                     | Compounds<br>(ng/mL)                        | 1st trimester                         |
|---------------------------------------------|---------------------------------------|---------------------------------------------|---------------------------------------|
|                                             | Inverse association with WQS<br>index |                                             | Inverse association with<br>WQS index |
| <b>WQS unit <math>\beta</math> (95% CI)</b> | -1.56 (-3.39, 0.28)                   | <b>WQS unit <math>\beta</math> (95% CI)</b> | -0.96 (-2.76, 0.84)                   |
| <b><i>p</i>-value</b>                       | 0.15                                  | <b><i>p</i>-value</b>                       | 0.46                                  |
|                                             | Average weight                        |                                             | Average weight                        |
| trans-DCCA                                  | 0.217                                 | trans-DCCA                                  | 0.211                                 |
| DETP                                        | 0.130                                 | DMTP                                        | 0.199                                 |
| DEP                                         | 0.126                                 | DETP                                        | 0.165                                 |
| DMTP                                        | 0.113                                 | IMI                                         | 0.116                                 |
| PNP                                         | 0.109                                 | TCPy                                        | 0.083                                 |
| DM-ACE                                      | 0.107                                 | DM-ACE                                      | 0.068                                 |
| TCPy                                        | 0.068                                 | DN-IMI                                      | 0.050                                 |
| IMI                                         | 0.056                                 | PNP                                         | 0.037                                 |
| IMI-olefin                                  | 0.042                                 | DEP                                         | 0.036                                 |
| 3-PBA                                       | 0.032                                 | 3-PBA                                       | 0.035                                 |

<sup>a</sup> WQSR analysis was conducted in negative direction according to the results from MLR and GEE models. Models were adjusted for maternal age (categorical), pre-pregnancy BMI (categorical), maternal education (categorical), passive smoking (categorical), folic acid supplement during pregnancy (categorical), parity (categorical), and breastfeeding duration (categorical), delivery mode (categorical), and sampling seasons (except for average trimesters, categorical). <sup>b</sup> The repeated holdout validation was used, basing on the mean of 100 repeated holdouts on 40%/60% training/testing splits.  $p$ -value < 0.05 was considered statistically significant which were derived from WQSR analysis.

**Table S11.** Comparison of the exposure levels and the associations of prenatal exposure to OPPs and PYRs (characterized by biomarkers) with child neurodevelopment observed in our study with other studies.

| Reference                                                  | Area/country    | Cohort/study | Sample Year | Sample       | N                                        | Trimester/age                                                                           | Compounds (median concentration if not indicated)                                                                                                                                                                                                                                                          | Method      | Outcome assessments                                                  | Main Results                                                                                                                                                                                                                                                                                                                   |
|------------------------------------------------------------|-----------------|--------------|-------------|--------------|------------------------------------------|-----------------------------------------------------------------------------------------|------------------------------------------------------------------------------------------------------------------------------------------------------------------------------------------------------------------------------------------------------------------------------------------------------------|-------------|----------------------------------------------------------------------|--------------------------------------------------------------------------------------------------------------------------------------------------------------------------------------------------------------------------------------------------------------------------------------------------------------------------------|
| <a href="#">(NHANES, 2020)</a>                             | USA             | NHANES       | 2013–2014   | Urine sample | 790                                      | Adult females (> 19 years)                                                              | TCPy (0.84 ng/mL);<br>PNP (0.56 ng/mL);<br>3-PBA (0.62 ng/mL);<br>Trans-DCCA (<0.6 ng/mL)                                                                                                                                                                                                                  | HPLC-MS/MS  | /                                                                    | /                                                                                                                                                                                                                                                                                                                              |
| <a href="#">(NHANES, 2022)</a>                             | USA             | NHANES       | 2017–2018   | Urine sample | 864                                      | Adult females (> 19 years)                                                              | DEP (1.84 ng/mL; 11.9 nM);<br>DETTP (0.13 ng/mL; 0.76 nM);<br>DMP (1.15 ng/mL; 9.13 nM);<br>DMTP (0.54 ng/mL; 3.80 nM);<br>DEDTP (<0.1 ng/mL);<br>DMDTP (<0.1 ng/mL);<br>ACE (<0.26 µg/g creatinine);<br>DM-ACE (<1.59 µg/g creatinine);<br>THM (7.40 µg/g creatinine);<br>CLO (15.3 µg/g creatinine);     | UHPLC-MS/MS | /                                                                    | /                                                                                                                                                                                                                                                                                                                              |
| <a href="#">(Anai et al., 2021)</a>                        | Kumamoto, Japan | /            | 2014–2016   | Urine sample | n = 109 participants (314 samples)       | Pregnant women (3 visits)                                                               |                                                                                                                                                                                                                                                                                                            | LC-MS/MS    | /                                                                    | /                                                                                                                                                                                                                                                                                                                              |
| <b>Child neurodevelopment assessed using Bayley scales</b> |                 |              |             |              |                                          |                                                                                         |                                                                                                                                                                                                                                                                                                            |             |                                                                      |                                                                                                                                                                                                                                                                                                                                |
| <a href="#">This study</a>                                 | Wuhan, China    | /            | 2014–2017   | urine sample | n=1041 participants (3123 urine samples) | the 1st trimester (13.0 ± 1.0 wks);<br>2nd trimester (24.5 ± 3.6 wks);<br>3rd trimester | *DEP (2.70–3.75 ng/mL; 17.6–24.5 nM);<br>*DETTP (1.18–1.72 ng/mL; 6.31–9.20 nM);<br>*DMP (2.99–4.74 ng/mL; 23.7–37.6 nM);<br>*DMTP (0.38–0.46 ng/mL; 2.64–3.24 nM);<br>TCPy (1.29–1.90 ng/mL);<br>PNP (1.71–2.12 ng/mL);<br>3-PBA (0.10–0.17 ng/mL);<br>trans-DCCA (0.12–0.21 ng/mL);<br>IMI (0.03 ng/mL); | UHPLC-MS/MS | <b>BSID-CR scales</b> (MDI and PDI) for children aged <b>2 years</b> | Higher urinary concentrations of some insecticide metabolites (i.e., TCPy, PNP, trans-DCCA, THM) at the 1st trimester were significantly associated with lower MDI/PDI scores, and the associations were more prominent among boys. Trans-DCCA and TCPy contributed most to the mixture effect of insecticide mixture exposure |

| Reference                                | Area/country                        | Cohort/study           | Sample Year | Sample       | N                  | Trimester/age                                                    | Compounds (median concentration if not indicated)                                                                                                                                                                                                                                                                                                                                                                                                                                                                                                                                                                                                                                                         | Method      | Outcome assessments                                                                                                                                                                                                                                                                                                                                                                                                                                                                                            | Main Results                                                                                                                                                                                                                    |
|------------------------------------------|-------------------------------------|------------------------|-------------|--------------|--------------------|------------------------------------------------------------------|-----------------------------------------------------------------------------------------------------------------------------------------------------------------------------------------------------------------------------------------------------------------------------------------------------------------------------------------------------------------------------------------------------------------------------------------------------------------------------------------------------------------------------------------------------------------------------------------------------------------------------------------------------------------------------------------------------------|-------------|----------------------------------------------------------------------------------------------------------------------------------------------------------------------------------------------------------------------------------------------------------------------------------------------------------------------------------------------------------------------------------------------------------------------------------------------------------------------------------------------------------------|---------------------------------------------------------------------------------------------------------------------------------------------------------------------------------------------------------------------------------|
| <a href="#">(Qi et al., 2022)</a>        | Xuan wei county in Southwe st China | /                      | 2016–2018   | urine sample | <i>n</i> = 419     | (33.9 ± 2.9 wks)<br><br>8–12;<br>20–23;<br>32–35 weeks gestation | <b>IMI-olefin</b> (0.33–0.43 ng/mL);<br><b>5-hydroxy-IMI</b> (0.52–0.73 ng/mL);<br><b>DN-IMI</b> (0.06–0.09 ng/mL);<br><b>DM-ACE</b> (0.75–0.93 ng/mL);<br><b>THM</b> (0.06–0.07 ng/mL);<br><b>CLO</b> (0.09–0.11 ng/mL);<br><b>DM-CLO</b> (0.23–0.32 ng/mL).<br><br><b>3-PBA</b><br>(0.21–0.24 µg/g cre.);<br><b>4F-3-PBA</b><br>(0.14–0.17 µg/g cre.);<br><b>cis-DBCA</b><br>(median: 0.21-0.81 µg/g cre.)<br><br><b>DEP</b> (NA);<br><b>DETP</b> (NA);<br><b>DEDTP</b> (NA);<br><b>DMP</b> (NA);<br><b>DMTP</b> (NA);<br><b>DMDTP</b> (NA);<br><b>ΣDEP<sup>a</sup></b> (GM: 18.1 nM);<br><b>ΣDMP<sup>a</sup></b> (GM: 81.5 nM);<br><b>ΣDAP<sup>a</sup></b> (GM: 114.9 nM),<br><b>TCPy</b> (3.54 ng/mL) | UHPLC-MS/MS | <b>BSID-III scales</b> (MDI and PDI) for children aged <b>1 year</b><br><br><b>Bayley Scales</b> (MDI and PDI) for children aged <b>6</b> (n=396), <b>12</b> (n=395), <b>24 months</b> (n=372); <b>CBCL</b> for children aged <b>24 months</b> (n=356); <b>DSM-oriented scales</b> for children aged <b>24 months</b> (n=356)<br><br><b>BSID-II scales</b> (MDI and PDI) for children aged <b>12 months</b> (n = 200) and <b>24 months</b> (n = 276); <b>WISC</b> for children aged <b>6–9 years</b> (n = 169) | In the second trimester, cognition scores were inversely associated with 3-PBA [ $\beta$ = -3.34 (95% CI = -6.11, -0.57)], and language scores were inversely associated with 3-PBA [ $\beta$ = -2.90 (95% CI = -5.20, -0.61)]. |
| <a href="#">(Eskenzazi et al., 2007)</a> | Salinas Valley, California          | CHAMAC OS              | 2000–2003   | urine sample | <i>n</i> = 372–396 | 14.0 and 26.6 weeks gestation (using average concentrations)     | <b>DEP</b> (NA); <b>DETP</b> (NA); <b>DEDTP</b> (NA);<br><b>DMP</b> (NA); <b>DMTP</b> (NA);<br><b>DMDTP</b> (NA);<br><b>ΣDEP<sup>a</sup></b> (GM: 18.1 nM);<br><b>ΣDMP<sup>a</sup></b> (GM: 81.5 nM);<br><b>ΣDAP<sup>a</sup></b> (GM: 114.9 nM),<br><b>TCPy</b> (3.54 ng/mL)                                                                                                                                                                                                                                                                                                                                                                                                                              | HPLC-MS/MS  | <b>BSID-II scales</b> (MDI and PDI) for children aged <b>12 months</b> (n = 200) and <b>24 months</b> (n = 276); <b>WISC</b> for children aged <b>6–9 years</b> (n = 169)                                                                                                                                                                                                                                                                                                                                      | For every 10-fold increase in pregnancy averaged ΣDEP and ΣDAP concentrations, they found a 3.64 and 3.54-point decrease in the 24-month-olds' MDI scores, respectively.                                                        |
| <a href="#">(Engel et al., 2011)</a>     | New York City                       | the Mount Sinai cohort | 1998–2002   | urine sample | <i>n</i> = 360     | 3rd-trimester (26-28 weeks gestation)                            | <b>DEP</b> (NA); <b>DETP</b> (NA); <b>DEDTP</b> (NA);<br><b>DMP</b> (NA); <b>DMTP</b> (NA);<br><b>DMDTP</b> (NA);<br><b>ΣDEP<sup>a</sup></b> (20.2 nM);<br><b>ΣDMP<sup>a</sup></b> (44.8 nM);<br><b>ΣDAP<sup>a</sup></b> (81.3 nM)                                                                                                                                                                                                                                                                                                                                                                                                                                                                        | GC-MS/MS    | <b>BSID-II scales</b> (MDI and PDI) for children aged <b>12 months</b> (n = 200) and <b>24 months</b> (n = 276); <b>WISC</b> for children aged <b>6–9 years</b> (n = 169)                                                                                                                                                                                                                                                                                                                                      | At the 12-month BSID-II exam, each 10-fold increase in maternal ΣDEP and ΣDAP was associated with a 3.35 and 3.29-unit decrease in MDI scores, respectively.                                                                    |



| Reference                              | Area/country          | Cohort/study      | Sample Year | Sample                | N                  | Trimester/age                      | Compounds<br>(median concentration if not indicated)                                                                                                                                                                    | Method   | Outcome assessments                                                                                         | Main Results                                                                                                                                                                                                                                                                                                                                                                                    |
|----------------------------------------|-----------------------|-------------------|-------------|-----------------------|--------------------|------------------------------------|-------------------------------------------------------------------------------------------------------------------------------------------------------------------------------------------------------------------------|----------|-------------------------------------------------------------------------------------------------------------|-------------------------------------------------------------------------------------------------------------------------------------------------------------------------------------------------------------------------------------------------------------------------------------------------------------------------------------------------------------------------------------------------|
| <a href="#">(Kongtip et al., 2017)</a> | Thailand              | /                 | 2011        | urine sample          | n = 50             | 3rd-trimester (28 weeks gestation) | <b>DMP</b> (36.83 nM);<br><b>DEP</b> (15.15 nM);<br><b>DETP</b> (0.07 nM);<br><b>DEDTP</b> (0.15 nM);<br><b>ΣDEP<sup>a</sup></b> (37.8 nM);<br><b>ΣDAP<sup>b</sup></b> (85.47 nM)                                       | GC-MS    | <b>BSID-III scales</b> (MDI and PDI) for children aged <b>five months</b>                                   | For each IQR increase in maternal ΣDEP and ΣDAP metabolite levels were associated with a 3.46 and 4.42-unit decrease in MDI scores, respectively. For each IQR increase in maternal ΣDEP level was significantly associated with a 1.77-unit decrease in MDI scores.                                                                                                                            |
| <a href="#">(Rauh et al., 2006)</a>    | New York City         | /                 | 1998–2002   | umbilical cord plasma | n = 254            | /                                  | <b>Chlorpyrifos</b><br>(mean: 7.6 pg/g)                                                                                                                                                                                 | GC-HR-MS | <b>BSID-II scales</b> (MDI and PDI) for children aged 12, 24, and 36 months                                 | Children with higher cord blood level of chlorpyrifos (>6.17 pg/g plasma) had 6.5 points lower PDI and 3.3 points lower MDI at 3 years of age compared with those with lower exposure level.                                                                                                                                                                                                    |
| <a href="#">(Lovasi et al., 2011)</a>  | New York City         | /                 | 1998–2002   | umbilical cord plasma | n = 266            | /                                  | <b>Chlorpyrifos</b><br>(mean: 7.6 pg/g)                                                                                                                                                                                 | GC-HR-MS | <b>BSID-II scales</b> (MDI and PDI) for children aged <b>36 months</b>                                      | Higher chlorpyrifos exposure (greater than 6.17 pg/g) was associated with an approximately 7.0-point decrease in PDI and an approximately 3.0-point decrease in MDI at age 36 months.                                                                                                                                                                                                           |
| <a href="#">(Eskenza et al., 2018)</a> | Limpopo, South Africa | The VHEMBE Cohort | 2012–2013   | urine sample          | n = 689<br>n = 681 | 3rd-trimester (prior to delivery)  | <b>trans-DCCA</b> (SG-median: 0.34 ng/mL);<br><b>3-PBA</b> (SG-median: 0.70 ng/mL);<br><b>4F-3PBA</b> (SG-median: <0.011 ng/mL); <b>cis-DBCA</b> (SG-median: 0.223 ng/mL);<br><b>cis-DCCA</b> (SG-median: 0.301 ng/mL); | GC-MS    | <b>BSID-III scales</b> (MDI and PDI) for children aged <b>1 year</b> (n = 689) <b>and 2 years</b> (n = 681) | At the 1-y visit, each 10-fold increase in maternal cis-DCCA, trans-DCCA, and 3-PBA was associated with a 0.63, 0.48, and 0.58-unit decrease in social-emotional scores, respectively. At 2 y of age, a 10-fold increase in maternal cis-DBCA concentrations was associated with a 0.40-unit decrease in Expressive Communication scores and a 1.74-unit decrease in Language Composite scores. |

| Reference                                                 | Area/country           | Cohort/study       | Sample Year | Sample       | N              | Trimester/age                                            | Compounds (median concentration if not indicated)                                                                                                                                                                                                                                                                                                                                 | Method     | Outcome assessments                                                                                     | Main Results                                                                                                                                                                                                                    |
|-----------------------------------------------------------|------------------------|--------------------|-------------|--------------|----------------|----------------------------------------------------------|-----------------------------------------------------------------------------------------------------------------------------------------------------------------------------------------------------------------------------------------------------------------------------------------------------------------------------------------------------------------------------------|------------|---------------------------------------------------------------------------------------------------------|---------------------------------------------------------------------------------------------------------------------------------------------------------------------------------------------------------------------------------|
| <a href="#">(Fluegge et al., 2016)</a>                    | Cincinnati, Ohio       | /                  | 2002–2005   | urine sample | <i>n</i> = 118 | the 2nd trimester; the 3rd trimester                     | <b>3-PBA</b> (7.28–8.36 ng/kg/day),<br><b>trans-DCCA</b> (5.10–5.97 ng/kg/day),<br><b>TCPy</b> (19.62–20.45 ng/kg/day),<br><b>cis-DCCA</b> (0.0019–2.56 ng/kg/day)                                                                                                                                                                                                                | GC-MS      | <b>BSID-II scales</b> (MDI and PDI) for children aged <b>three months</b>                               | Each 1 ng/kg bw/day increase in TCPy at the third trimester was associated with lower PDI score by -0.031; Each 1 ng/kg bw/day increase in the 3-PBA metabolite was associated with approximately 0.10 to 0.12 lower MDI score. |
| <a href="#">(Donauer et al., 2016)</a>                    | Cincinnati, Ohio       | The HOME Study     | 2003–2006   | urine sample | <i>n</i> = 327 | 16 and 26 weeks gestation (using average concentrations) | <b>DEP</b> (GM: 0.50 µg/g cre.);<br><b>DETP</b> (GM: 0.11 µg/g cre.);<br><b>DEDTP</b> (GM: 0.02 µg/g cre.);<br><b>DMP</b> (GM: 1.45 µg/g cre.);<br><b>DMTP</b> (GM: 2.11 µg/g cre.);<br><b>DMDTP</b> (GM: 0.08 µg/g cre.);<br><b>ΣDEP<sup>a</sup></b> (GM: 9.3 nmol/g cre.);<br><b>ΣDMP<sup>a</sup></b> (GM: 45.9 nmol/g cre.);<br><b>ΣDAP<sup>a</sup></b> (GM: 73.7 nmol/g cre.) | GC-MS/MS   | <b>BSID-II scales</b> (MDI and PDI) for children aged <b>1 year, 2 years, and 3 years.</b>              | No associations between prenatal exposure to organophosphate pesticides and cognition at 1–5 years of age were found.                                                                                                           |
| <a href="#">(Watkins et al., 2016)</a>                    | Mexico City            | The ELEMENT study  | 1997–2001   | urine sample | <i>n</i> = 187 | the 3rd trimester                                        | <b>3-PBA</b><br>(<0.25 ng/mL; P75: 0.34 ng/mL)                                                                                                                                                                                                                                                                                                                                    | HPLC-MS/MS | <b>BSID-II scales</b> (MDI and PDI) for children aged <b>24 and 36 months</b>                           | No associations between in utero 3-PBA concentrations and PDI scores at either 24 or 36 months of age were observed.                                                                                                            |
| <b>Child neurodevelopment assessed using other scales</b> |                        |                    |             |              |                |                                                          |                                                                                                                                                                                                                                                                                                                                                                                   |            |                                                                                                         |                                                                                                                                                                                                                                 |
| <a href="#">(Jusko et al., 2019)</a>                      | Rotterdam, Netherlands | Generation R Study | 2004–2006   | urine sample | <i>n</i> = 708 | <18, 18–25, and >25 weeks of gestation                   | <b>DEP</b> (31–32.7 nmol/g cre);<br><b>DETP</b> (7.0–7.5 nmol/g cre);<br><b>DEDTP</b> (P75: 0.3 nmol/g cre);<br><b>DMP</b> (130–138 nmol/g cre);<br><b>DMTP</b> (103.2–111.1 nmol/g cre);<br><b>DMDTP</b> (3.0–3.3 nmol/g cre);                                                                                                                                                   | GC-MS/MS   | Mosaics and Categories subtests from the Snijders-Oomen Nonverbal Intelligence Test-Revised (nonverbal) | An inverse relation between nonverbal IQ and late pregnancy urinary ΣDAP and ΣDMP concentration was observed.                                                                                                                   |

| Reference                           | Area/country            | Cohort/study             | Sample Year | Sample                | N                  | Trimester/age                     | Compounds<br>(median concentration if not indicated)                                                                                                                                                                                                                                               | Method        | Outcome assessments                                                                      | Main Results                                                                                                                              |
|-------------------------------------|-------------------------|--------------------------|-------------|-----------------------|--------------------|-----------------------------------|----------------------------------------------------------------------------------------------------------------------------------------------------------------------------------------------------------------------------------------------------------------------------------------------------|---------------|------------------------------------------------------------------------------------------|-------------------------------------------------------------------------------------------------------------------------------------------|
|                                     |                         |                          |             |                       |                    |                                   | <p><math>\Sigma</math>DEP<sup>a</sup> (41.5–43.4 nmol/g cre);<br/> <math>\Sigma</math>DMP<sup>a</sup> (249.1–269.1 nmol/g cre);<br/> <math>\Sigma</math>DAP<sup>a</sup> (310–316.7 nmol/g cre)</p>                                                                                                 |               | IQ) for children aged 6 years                                                            |                                                                                                                                           |
| <a href="#">(Liu et al., 2016)</a>  | Jiangsu Province, China | /                        | 2011–2012   | urine sample          | n = 310            | 3rd-trimester (prior to delivery) | <p>DEP (75.73 nM);<br/> DETTP (21.69 nM);<br/> DEDTP (6.73 nM);<br/> DMP (6.80 nM);<br/> DMTTP (62.28 nM);<br/> DMDTP (27.25 nM);<br/> <math>\Sigma</math>DEP<sup>a</sup> (134.88 nM);<br/> <math>\Sigma</math>DMP<sup>a</sup> (128.16 nM);<br/> <math>\Sigma</math>DAP<sup>a</sup> (295.8 nM)</p> | GC-MS         | GDS for children aged 2 years                                                            | Adverse associations between prenatal and postnatal OP exposure and neurodevelopment of infants were observed only in boys, not in girls. |
| <a href="#">(Wang et al., 2017)</a> | Shandong, China         | /                        | 2011–2013   | urine sample          | n = 235<br>n = 237 | 3rd-trimester (prior to delivery) | <p>DEP (5.17 ng/mL);<br/> DETTP (0.78 ng/mL);<br/> DMP (9.85 ng/mL);<br/> DMTTP (0.78 ng/mL);<br/> <math>\Sigma</math>DEP<sup>a</sup> (NA);<br/> <math>\Sigma</math>DMP<sup>a</sup> (NA);<br/> <math>\Sigma</math>DAP<sup>a</sup> (352.67 nmol/g cre.)</p>                                         | GC-MS         | GDS for children aged 12 (n=235) and 24 months (n=237).                                  | Prenatal OP exposure was negatively associated with 24-month-old children's DQs, especially among boys.                                   |
| <a href="#">(Chiu et al., 2021)</a> | Taiwan, China           | Taiwan Birth Panel Study | 2004–2005   | cord blood            | n = 425            | /                                 | Chlorpyrifos (GM: 5.29 ng/mL)                                                                                                                                                                                                                                                                      | LC-HESI-MS/MS | Comprehensive Developmental Inventory for Infants and Toddlers (CDIIT) at 2 years of age | Prenatal chlorpyrifos exposure affected performance in the cognitive and language domains, especially in boys.                            |
| <a href="#">(Rauh et al., 2011)</a> | New York City           | /                        | /           | umbilical cord plasma | n = 265            | /                                 | Chlorpyrifos (mean: 3.7 pg/g)                                                                                                                                                                                                                                                                      | GC-MS         | WISC-IV for children at 7 years of age                                                   | Prenatal chlorpyrifos exposure was negatively associated with 7-year-old children's Working Memory Index and Full-Scale IQ.               |

| Reference                                    | Area/country       | Cohort/study           | Sample Year | Sample       | N              | Trimester/age                            | Compounds<br>(median concentration if not indicated)                                                                                                                                                              | Method   | Outcome assessments                                                                                                                                                                                                    | Main Results                                                                                                                                                             |
|----------------------------------------------|--------------------|------------------------|-------------|--------------|----------------|------------------------------------------|-------------------------------------------------------------------------------------------------------------------------------------------------------------------------------------------------------------------|----------|------------------------------------------------------------------------------------------------------------------------------------------------------------------------------------------------------------------------|--------------------------------------------------------------------------------------------------------------------------------------------------------------------------|
| <a href="#">(Furlong et al., 2017)</a>       | New York City      | the Mount Sinai cohort | 1998–2002   | urine sample | <i>n</i> = 404 | 3rd trimester (25–40 weeks of gestation) | DEP (0.2 nM);<br>DETP (9.9 nM);<br>DEDTP (0.1 nM);<br>DMP (12.6 nM);<br>DMTP (23.5 nM);<br>DMDTP (0.3 nM);<br>ΣDEP <sup>a</sup> (16.6 nM);<br>ΣDMP <sup>a</sup> (37.1 nM)                                         | GC-MS/MS | BASC for children aged 4–9 years ( <i>n</i> = 238); BRIEF for children aged 4–9 years ( <i>n</i> = 242); WPPSI-III for children aged 6 years ( <i>n</i> = 162); WISC-IV for children aged 7–9 years ( <i>n</i> = 161); | Inverse associations between Σ DMPs and Internalizing Factor scores, and between Σ DEPs and the working memory index were observed.                                      |
| <a href="#">(Ntantu Nkinsa et al., 2020)</a> | 10 Canadian cities | the MIREC cohort       | 2008–2011   | urine sample | <i>n</i> = 247 | 1st trimester                            | DEP (NA); DETP (NA); DEDTP (NA);<br>DMP (NA); DMTP (NA); DMDTP (NA);<br>ΣDEP <sup>a</sup> (SG-median: 25.3 nM);<br>ΣDMP <sup>a</sup> (SG-median: 62.3 nM);<br>ΣDAP <sup>a</sup> (SG-median: 86.1 nM)              | GC-MS/MS | WPPSI-III for children aged 3–4 years                                                                                                                                                                                  | Urinary metabolites of organophosphate pesticides were not associated with IQ in girls, but higher maternal urinary DEAPs were associated with poorer Verbal IQ in boys. |
| <a href="#">(Zhang et al., 2014)</a>         | Shenyang, China    | /                      | 2011–2012   | urine sample | <i>n</i> = 708 | 3rd-trimester (prior to delivery)        | DEP (5.42 ng/mL);<br>DETP (7.04 ng/mL);<br>DEDTP (<1.0 ng/mL);<br>DMP (24.04 ng/mL);<br>DMTP (11.84 ng/mL);<br>ΣDEP <sup>a</sup> (GM: 107.39 nM);<br>ΣDMP <sup>b</sup> (GM: 283.66 nM);<br>ΣDAP <sup>c</sup> (NA) | GC-FPD   | Neonatal Behavioral Assessment (NBNA) for Neonates (3 days old)                                                                                                                                                        | Maternal exposure to OPs during pregnancy strongly associated with adverse neonatal neurobehavioral development.                                                         |
| <a href="#">(Furlong et al., 2014)</a>       | New York City      | the Mount Sinai cohort | 1998–2002   | urine sample | <i>n</i> = 136 | 3rd trimester (25–40 weeks of gestation) | DEP (NA);<br>DETP (NA);<br>DEDTP (NA);<br>DMP (NA);<br>DMTP (NA);<br>DMDTP (NA);                                                                                                                                  | GC-MS/MS | Social Responsiveness Scale (SRS) for children aged 7–9 years                                                                                                                                                          | The results support an association of prenatal OP exposure with deficits in social functioning among blacks and among boys                                               |

| Reference                               | Area/country    | Cohort/study           | Sample Year | Sample       | N              | Trimester/age                            | Compounds<br>(median concentration if not indicated)                                                                                                                                                                                                                                                                                                                                                                                             | Method   | Outcome assessments                                                                                                                  | Main Results                                                                                                                                                                                 |
|-----------------------------------------|-----------------|------------------------|-------------|--------------|----------------|------------------------------------------|--------------------------------------------------------------------------------------------------------------------------------------------------------------------------------------------------------------------------------------------------------------------------------------------------------------------------------------------------------------------------------------------------------------------------------------------------|----------|--------------------------------------------------------------------------------------------------------------------------------------|----------------------------------------------------------------------------------------------------------------------------------------------------------------------------------------------|
| <a href="#">(Furlong et al., 2014)</a>  | New York City   | the Mount Sinai cohort | 1998–2002   | urine sample | <i>n</i> = 136 | 3rd trimester (25-40 weeks of gestation) | <p> <math>\Sigma</math>DEP<sup>a</sup> (GM: 17.4 nM);<br/> <math>\Sigma</math>DMP<sup>a</sup> (GM: 41.7 nM);<br/> <math>\Sigma</math>DAP<sup>a</sup> (GM: 76.9 nM) </p> <p> DEP (NA);<br/> DETTP (NA);<br/> DEDTP (NA);<br/> DMP (NA);<br/> DMTP (NA);<br/> DMDTP (NA);<br/> <math>\Sigma</math>DEP<sup>a</sup> (GM: 17.4 nM);<br/> <math>\Sigma</math>DMP<sup>a</sup> (GM: 41.7 nM);<br/> <math>\Sigma</math>DAP<sup>a</sup> (GM: 76.9 nM) </p> | GC-MS/MS | Social Responsiveness Scale (SRS) for children aged <b>7-9 years</b>                                                                 | The results support an association of prenatal OP exposure with deficits in social functioning among blacks and among boys.                                                                  |
| <a href="#">(Lizé et al., 2022)</a>     | French          | PELAGIE cohort         | 2002–2006   | urine sample | <i>n</i> = 185 | 1st trimester (<19weeks of gestation)    | <p> <math>\Sigma</math>DEP<sup>a</sup> (&lt;LOD nM);<br/> <math>\Sigma</math>DMP<sup>a</sup> (24.1 nM);<br/> <math>\Sigma</math>DAP<sup>a</sup> (33.3 nM);<br/> <b>chlorpyrifos</b> (&lt;0.01ng/mL),<br/> <b>CPF-oxon</b> (&lt;0.001 ng/mL);<br/> <b>TCPy</b> (&lt;0.042 ng/mL) </p>                                                                                                                                                             | LC/MS-MS | The Childhood Autism Spectrum Test (CAST) parent questionnaire was used to screen for autistic traits in <b>11-year-old</b> children | The findings indicated a statistically significant association between prenatal maternal exposure to CPF and an increase in autistic traits for 11-year-old children, especially among boys. |
| <a href="#">(Dalsager et al., 2019)</a> | Odense, Denmark | Odense Child Cohort    | 2010–2012   | urine sample | <i>n</i> = 948 | 3rd-trimester (28 weeks gestation)       | <p> <b>3-PBA</b> (0.24 ng/mL);<br/> <b>trans-DCCA</b> (&lt;0.4 ng/mL);<br/> <b>4-F-3-PBA</b> (&lt;0.2 ng/mL);<br/> <b>cis-DCCA</b> (&lt;0.5 ng/mL);<br/> <b>cis-DBCA</b> (&lt;0.5 ng/mL);<br/> <b>TCPy</b> (1.61 ng/mL) </p>                                                                                                                                                                                                                     | LC-MS/MS | ADHD traits in <b>2-4-year-old</b> children assessed by <b>CBCL</b> for ages 1.5–5 years                                             | Prenatal exposure to pyrethroids was associated with ADHD related traits at 2–4 years of age.                                                                                                |

| Reference                                  | Area/country | Cohort/study      | Sample Year             | Sample       | N                                | Trimester/age                          | Compounds<br>(median concentration if not indicated)                                                                                                                                       | Method     | Outcome assessments                                                                                                   | Main Results                                                                                                                              |
|--------------------------------------------|--------------|-------------------|-------------------------|--------------|----------------------------------|----------------------------------------|--------------------------------------------------------------------------------------------------------------------------------------------------------------------------------------------|------------|-----------------------------------------------------------------------------------------------------------------------|-------------------------------------------------------------------------------------------------------------------------------------------|
| <a href="#">(Lee et al., 2022)</a>         | South Korea  | /                 | 2008–2010               | urine sample | <i>n</i> = 449<br><i>n</i> = 414 | 14-27 weeks of gestation               | <b>3-PBA</b> (0.77 ng/mL)                                                                                                                                                                  | GC-MS/MS   | ADHD symptoms at <b>ages 6 (n=449) and 8 (n=414)</b> were assessed using the ADHD Rating Scale IV ( <b>ARS</b> )      | Prenatal exposure to 3-PBA was associated with ADHD symptoms.                                                                             |
| <a href="#">(Binter et al., 2020)</a>      | French       | PELAGIE cohort    | 2002–2006               | urine sample | <i>n</i> = 95                    | 1st trimester (<19 weeks of gestation) | DEP (NA);<br>DETP (NA);<br>DEDTP (NA);<br>DMP (NA);<br>DMTP (NA);<br>DMDTP (NA);<br>ΣDEP <sup>a</sup> (0.8 μmol/L);<br>ΣDMP <sup>a</sup> (31.8 μmol/L);<br>ΣDAP <sup>a</sup> (44.4 μmol/L) | LC-MS/MS   | Motor inhibition function of <b>10- to 12-year-old</b> children was evaluated using <b>Go/No-Go paradigm</b>          | Increasing levels of DM and DE were associated with decreased brain activity in the left inferior and bilateral superior frontal regions. |
| <a href="#">(Fortenberry et al., 2014)</a> | Mexico City  | The ELEMENT study | 1997–2000;<br>2001–2005 | urine sample | <i>n</i> = 142                   | 3rd trimester                          | <b>TCPy</b> (1.78 ng/mL)                                                                                                                                                                   | HPLC-MS/MS | Child attention and hyperactivity of children aged <b>6–11 years</b> was assessed using <b>CRS-R, CPT, and BASC-2</b> | No statistically significant associations between maternal TCPY concentrations and ADHD-related outcomes in children were observed.       |
| <a href="#">(Cartier et al., 2016)</a>     | French       | PELAGIE cohort    | 2002–2006               | urine sample | <i>n</i> = 231                   | 1st trimester (<19 weeks of gestation) | DEP (NA);<br>DETP (NA);<br>DEDTP (NA);<br>DMP (NA);<br>DMTP (NA);<br>DMDTP (NA);<br>ΣDEP <sup>a</sup> (P75: 13.2 nM);<br>ΣDMP <sup>a</sup> (34.3 nM);                                      | LC-MS/MS   | <b>WISC-IV</b> was administered when the children were <b>6 years</b> of age to evaluate cognitive function           | No evidence that prenatal OP exposure adversely affecting cognitive function in 6-year-olds was found.                                    |

| Reference                               | Area/country              | Cohort/study        | Sample Year | Sample       | N              | Trimester/age                          | Compounds<br>(median concentration if not indicated)                                                                                                                                                                                              | Method     | Outcome assessments                                                                                               | Main Results                                                                                                                                                    |
|-----------------------------------------|---------------------------|---------------------|-------------|--------------|----------------|----------------------------------------|---------------------------------------------------------------------------------------------------------------------------------------------------------------------------------------------------------------------------------------------------|------------|-------------------------------------------------------------------------------------------------------------------|-----------------------------------------------------------------------------------------------------------------------------------------------------------------|
|                                         |                           |                     |             |              |                |                                        | $\Sigma$ DAP <sup>a</sup> (43.9 nM)                                                                                                                                                                                                               |            |                                                                                                                   |                                                                                                                                                                 |
| <a href="#">(Guo et al., 2019)</a>      | Sheyang, Jiangsu Province | SMBCS Cohort        | 2009–2010   | urine sample | <i>n</i> = 377 | 3rd-trimester (prior to delivery)      | <b>TCPy</b> (5.39 ng/mL)                                                                                                                                                                                                                          | GC-MS/MS   | <b>GDS</b> for children aged <b>3 years</b>                                                                       | The findings suggest that adverse neurodevelopmental effects were associated with early childhood CPF exposure, but not prenatal exposure.                      |
| <a href="#">(Viel et al., 2015)</a>     | French                    | PELAGIE cohort      | 2002–2006   | urine sample | <i>n</i> = 287 | 1st trimester (6-19 gestational weeks) | <b>3-PBA</b> (<0.008 ng/mL);<br><b>trans-DCCA</b> (0.14 ng/mL);<br><b>4-F-3-PBA</b> (<0.003 ng/mL),<br><b>cis-DCCA</b> (0.09 ng/mL),<br><b>cis-DBCA</b> (0.11 ng/mL);                                                                             | UPLC/MS-MS | <b>WISC-IV</b> was administered when the children were <b>6 years</b> of age to evaluate cognitive function       | Maternal pyrethroid metabolite concentrations were not consistently associated with any children's cognitive scores                                             |
| <a href="#">(Viel et al., 2017)</a>     | French                    | PELAGIE cohort      | 2002–2006   | urine sample | <i>n</i> = 287 | 1st trimester (6-19 gestational weeks) | <b>3-PBA</b> (<0.008 ng/mL);<br><b>trans-DCCA</b> (0.14 ng/mL);<br><b>cis-DBCA</b> (0.11 ng/mL);<br><b>4-F-3-PBA</b> (<0.003 ng/mL),<br><b>cis-DCCA</b> (0.09 ng/mL)                                                                              | UPLC/MS-MS | Child behavior at <b>age 6</b> was assessed using the Strengths and Difficulties Questionnaire (SDQ)              | Higher maternal urinary concentration of cis-DCCA was associated with internalizing difficulties                                                                |
| <a href="#">(Barkoski et al., 2021)</a> | California                | MARBLE S cohort     | 2007–2014   | urine sample | <i>n</i> = 194 | 14–27; >28 weeks gestation             | <b>3-PBA</b> (SG-median:1.45-1.46 ng/mL)                                                                                                                                                                                                          | HPLC-MS/MS | During the child's <b>3-year</b> visit, expert clinicians evaluate children on <b>ADOS</b>                        | Maternal urinary 3-PBA was not associated with a higher risk for ASD at 3-years                                                                                 |
| <a href="#">(Andersen et al., 2021)</a> | Odense, Denmark           | Odense Child Cohort | 2010–2012   | urine sample | <i>n</i> = 755 | 3rd-trimester (28 weeks gestation)     | <b>3-PBA</b> (0.24 µg/g cre.);<br><b>trans-DCCA</b> (<0.4µg/g cre.);<br><b>TCPy</b> (1.73 µg/g cre.);<br><b>ΣDEP<sup>a</sup></b> (23.7 nmol/g cre.);<br><b>ΣDMP<sup>a</sup></b> (30.9 nmol/g cre.);<br><b>ΣDAP<sup>a</sup></b> (59.6 nmol/g cre.) | UPLC-MS/MS | Language development at age <b>20–36 months</b> was assessed using the validated Danish adaption of <b>MB-CDI</b> | No significant association between gestational exposure to organophosphate or pyrethroid insecticides and early language development in the children was found. |

**Abbreviation:** **BSID-II**, The Bayley Scales of Infant Development, 2nd edition; **BSID-III**, Bayley Scales of Infant and Toddler Development-III; **MDI**, Mental Development Index; **PDI**, Psychomotor Development Index; **GDS**, Gesell Developmental Schedules; **WISC**, Wechsler Intelligence Scale for Children; **WPPSI-III**, Wechsler Preschool and Primary Scales of Intelligence-III; **DSM**, Diagnostic and Statistical Manual of Mental Disorders diagnoses; **CRS-R**, Conners' Prental Rating Scales-Revised; **CPT**, Conners' Continuous Performance Test; **BASC**, Behavioral Assessment Scale for Children. **BRIEF**, Behavior Rating Inventory of Executive Functioning; **ADOS**, Autism Diagnostic Observation Scale; **MB-CDI**, MacArthur-Bates Communicative Development Inventories; **CBCL**, The Child Behavior Checklist; **GC-MS/MS**, Gas chromatography-tandem mass spectrometry; **GC-MS**, Gas chromatography-mass spectrometry; **GC-HR-MS**, Gas chromatography-high-resolution mass spectrometry; **UHPLC-MS/MS**, Ultra-High Performance Liquid Chromatography system coupled with a tandem Mass Spectrometry detector; **HPLC-MS/MS**, High performance liquid chromatography-tandem mass spectrometry; **LC-HESI-MS/MS**, liquid chromatography-heated electrospray ionization tandem mass spectrometry; **GC-FPD**, Gas chromatography with flame photometric detection; **LC/MS-MS**, liquid chromatography-electrospray ionization tandem mass spectrometry; **DMP**, dimethylphosphate, **DMTP**, dimethylthiophosphate, **DMDTP**, dimethyldithiophosphate; **DEP**, diethylphosphate, **DETP**, diethylthiophosphate, and **DEDTP**, diethyldithiophosphate; **CPF**, chlorpyrifos; **CPF-oxon**, chlorpyrifos-oxon; **TCPy**, 3,5,6-trichloro-2-pyridinol; <sup>a</sup>:  $\Sigma$ DEP, the sum concentrations of DEP, DETP, and DEDTP;  $\Sigma$ DMP, the sum concentrations of DMP, DMTP, and DMDTP;  $\Sigma$ DAP, the sum concentrations of DEP, DETP, DEDTP, DMP, DMTP, and DMDTP; <sup>b</sup>:  $\Sigma$ DMP, the sum concentrations of DMP and DMTP;  $\Sigma$ DAP, the sum concentrations of DEP, DETP, DEDTP, and DMP; <sup>c</sup>:  $\Sigma$ DAP, the sum concentrations of DEP, DETP, DEDTP, DMP and DMTP; **3-PBA**, 3-phenoxybenzoic acid; **4F-3-PBA**, 4-fluoro-3-phenoxybenzoic acid; **cis-DCCA**, cis-(2,2-dichlorovinyl)-2,2-dimethylcyclopropane-1-carboxylic acid; **trans-DCCA**, trans-(2,2-dichlorovinyl)-2,2-dimethylcyclopropane-1-carboxylic acid; **cis-DBCA**, cis-(2,2-dibromovinyl)-2,2-dimethylcyclopropane-1-carboxylic acid; \*For ease of comparison with other studies, DAPs were also converted from the untransformed concentration (ng/mL) to their corresponding molar concentrations (nM) (DEP = concentration/0.154  $\mu$ g/nmol; DETP = concentration/0.170  $\mu$ g/nmol; DMP = concentration/0.126  $\mu$ g/nmol; DMTP = concentration/0.142  $\mu$ g/nmol); **GM**: geometric mean; **Cre.**: creatinine; **NA**: not available.



## References

- Anai A, Hisada A, Yunohara T, Iwasaki M, Arizono K, Katoh T. Urinary neonicotinoids level among pregnant women in Japan. *International journal of hygiene and environmental health* 2021; 236: 113797. <http://dx.doi.org/10.1016/j.ijheh.2021.113797>.
- Andersen HR, Dalsager L, Jensen IK, Timmermann CAG, Olesen TS, Trecca F, et al. Prenatal exposure to pyrethroid and organophosphate insecticides and language development at age 20-36 months among children in the Odense Child Cohort. *International Journal of Hygiene and Environmental Health* 2021; 235: 113755. <http://dx.doi.org/10.1016/j.ijheh.2021.113755>.
- Barkoski JM, Philippat C, Tancredi D, Schmidt RJ, Ozonoff S, Barr DB, et al. In utero pyrethroid pesticide exposure in relation to autism spectrum disorder (ASD) and other neurodevelopmental outcomes at 3 years in the MARBLES longitudinal cohort. *Environmental Research* 2021; 194: 110495. <http://dx.doi.org/10.1016/j.envres.2020.110495>.
- Binter AC, Bannier E, Saint-Amour D, Simon G, Barillot C, Monfort C, et al. Exposure of pregnant women to organophosphate insecticides and child motor inhibition at the age of 10-12 years evaluated by fMRI. *Environmental research* 2020; 188: 109859. <http://dx.doi.org/10.1016/j.envres.2020.109859>.
- Cartier C, Warembourg C, Le Maner-Idrissi G, Lacroix A, Rouget F, Monfort C, et al. Organophosphate Insecticide Metabolites in Prenatal and Childhood Urine Samples and Intelligence Scores at 6 Years of Age: Results from the Mother-Child PELAGIE Cohort (France). *Environmental health perspectives* 2016; 124: 674-80. <http://dx.doi.org/10.1289/ehp.1409472>.
- Chiu KC, Sisca F, Ying JH, Tsai WJ, Hsieh WS, Chen PC, et al. Prenatal chlorpyrifos exposure in association with PPAR $\gamma$  H3K4me3 and DNA methylation levels and child development. *Environmental pollution* 2021; 274: 116511. <http://dx.doi.org/10.1016/j.envpol.2021.116511>.
- Dalsager L, Fage-Larsen B, Bilenberg N, Jensen TK, Nielsen F, Kyhl HB, et al. Maternal urinary concentrations of pyrethroid and chlorpyrifos metabolites and attention deficit hyperactivity disorder (ADHD) symptoms in 2-4-year-old children from the Odense Child Cohort. *Environmental research* 2019; 176: 108533. <http://dx.doi.org/10.1016/j.envres.2019.108533>.
- Donauer S, Altaye M, Xu Y, Sucharew H, Succop P, Calafat AM, et al. An Observational Study to Evaluate Associations Between Low-Level Gestational Exposure to Organophosphate Pesticides and Cognition During Early Childhood. *American journal of epidemiology* 2016; 184: 410-8. <http://dx.doi.org/10.1093/aje/kwv447>.
- Engel SM, Wetmur J, Chen J, Zhu C, Barr DB, Canfield RL, et al. Prenatal exposure to organophosphates, paraoxonase 1, and cognitive development in childhood. *Environmental health perspectives* 2011; 119: 1182-8. <http://dx.doi.org/10.1289/ehp.1003183>.
- Eskenazi B, An S, Rauch SA, Coker ES, Maphula A, Obida M, et al. Prenatal Exposure to DDT and Pyrethroids for Malaria Control and Child Neurodevelopment: The VHEMBE Cohort, South Africa. *Environmental health perspectives* 2018; 126: 047004. <http://dx.doi.org/10.1289/ehp2129>.
- Eskenazi B, Marks AR, Bradman A, Harley K, Barr DB, Johnson C, et al. Organophosphate pesticide exposure and neurodevelopment in young Mexican-American children. *Environmental health perspectives* 2007; 115: 792-8. <http://dx.doi.org/10.1289/ehp.9828>.
- Fluegge KR, Nishioka M, Wilkins JR, 3rd. Effects of simultaneous prenatal exposures to organophosphate and synthetic pyrethroid insecticides on infant neurodevelopment at three months of age. *Journal of environmental toxicology and public health* 2016; 1: 60-73. <http://dx.doi.org/10.5281/zenodo.218417>.
- Fortenberry GZ, Meeker JD, Sánchez BN, Barr DB, Panuwet P, Bellinger D, et al. Urinary 3,5,6-trichloro-2-pyridinol (TCPY) in pregnant women from Mexico City: distribution, temporal variability, and relationship with child attention and hyperactivity. *International journal of hygiene and environmental health* 2014; 217: 405-12. <http://dx.doi.org/10.1016/j.ijheh.2013.07.018>.
- Furlong MA, Engel SM, Barr DB, Wolff MS. Prenatal exposure to organophosphate pesticides and reciprocal social behavior in childhood. *Environment international* 2014; 70: 125-31. <http://dx.doi.org/10.1016/j.envint.2014.05.011>.
- Furlong MA, Herring A, Buckley JP, Goldman BD, Daniels JL, Engel LS, et al. Prenatal exposure to organophosphorus pesticides and childhood neurodevelopmental phenotypes. *Environmental research* 2017; 158: 737-747. <http://dx.doi.org/10.1016/j.envres.2017.07.023>.
- Guo J, Zhang J, Wu C, Lv S, Lu D, Qi X, et al. Associations of prenatal and childhood chlorpyrifos exposure

- with Neurodevelopment of 3-year-old children. *Environmental pollution* 2019; 251: 538-546. <http://dx.doi.org/10.1016/j.envpol.2019.05.040>.
- Jusko TA, van den Dries MA, Pronk A, Shaw PA, Guxens M, Spaan S, et al. Organophosphate Pesticide Metabolite Concentrations in Urine during Pregnancy and Offspring Nonverbal IQ at Age 6 Years. *Environmental health perspectives* 2019; 127: 17007. <http://dx.doi.org/10.1289/ehp3024>.
- Kongtip P, Techasaensiri B, Nankongnab N, Adams J, Phamonphon A, Surach A, et al. The Impact of Prenatal Organophosphate Pesticide Exposures on Thai Infant Neurodevelopment. *International journal of environmental research and public health* 2017; 14. <http://dx.doi.org/10.3390/ijerph14060570>.
- Lee KS, Lim YH, Lee YA, Shin CH, Kim BN, Hong YC, et al. The association of prenatal and childhood pyrethroid pesticide exposure with school-age ADHD traits. *Environment international* 2022; 161: 107124. <http://dx.doi.org/10.1016/j.envint.2022.107124>.
- Li ZM, Robinson M, Kannan K. An assessment of exposure to several classes of pesticides in pet dogs and cats from New York, United States. *Environment international* 2022; 169: 107526. <http://dx.doi.org/10.1016/j.envint.2022.107526>.
- Liu P, Wu C, Chang X, Qi X, Zheng M, Zhou Z. Adverse Associations of both Prenatal and Postnatal Exposure to Organophosphorous Pesticides with Infant Neurodevelopment in an Agricultural Area of Jiangsu Province, China. *Environmental health perspectives* 2016; 124: 1637-1643. <http://dx.doi.org/10.1289/ehp196>.
- Lizé M, Monfort C, Rouget F, Limon G, Durand G, Tillaut H, et al. Prenatal exposure to organophosphate pesticides and autism spectrum disorders in 11-year-old children in the French PELAGIE cohort. *Environmental research* 2022; 212: 113348. <http://dx.doi.org/10.1016/j.envres.2022.113348>.
- Lovasi GS, Quinn JW, Rauh VA, Perera FP, Andrews HF, Garfinkel R, et al. Chlorpyrifos exposure and urban residential environment characteristics as determinants of early childhood neurodevelopment. *American journal of public health* 2011; 101: 63-70. <http://dx.doi.org/10.2105/ajph.2009.168419>.
- Mahai G, Wan Y, Xia W, Wang A, Qian X, Li Y, et al. Exposure assessment of neonicotinoid insecticides and their metabolites in Chinese women during pregnancy: A longitudinal study. *The Science of the total environment* 2022; 818: 151806. <http://dx.doi.org/10.1016/j.scitotenv.2021.151806>.
- NHANES. National Health and Nutrition Examination Survey, NHANES 2013-2014 Laboratory Data. [https://www.cdc.gov/Nchs/Nhanes/2013-2014/UPHOPM\\_H.htm](https://www.cdc.gov/Nchs/Nhanes/2013-2014/UPHOPM_H.htm), 2020.
- NHANES. National Health and Nutrition Examination Survey 2017-2018 Data. Organophosphate Insecticides - Dialkyl Phosphate Metabolites - Urine. [https://www.cdc.gov/Nchs/Nhanes/2017-2018/OPD\\_J.htm](https://www.cdc.gov/Nchs/Nhanes/2017-2018/OPD_J.htm). 2022.
- NHC. National Health Commission of the People's Republic of China, Standard of recommendation for weight gain during pregnancy period. <http://www.nhc.gov.cn/wjw/fyjk/202208/864ddc16511148819168305d3e576de9/files/4c0e42b584dd4c25b1a4004dd260d561.pdf>. 2022.
- Ntantu Nkinsa P, Muckle G, Ayotte P, Lanphear BP, Arbuckle TE, Fraser WD, et al. Organophosphate pesticides exposure during fetal development and IQ scores in 3 and 4-year old Canadian children. *Environmental research* 2020; 190: 110023. <http://dx.doi.org/10.1016/j.envres.2020.110023>.
- Qi Z, Song X, Xiao X, Loo KK, Wang MC, Xu Q, et al. Effects of prenatal exposure to pyrethroid pesticides on neurodevelopment of 1-year-old children: A birth cohort study in China. *Ecotoxicology and environmental safety* 2022; 234: 113384. <http://dx.doi.org/10.1016/j.ecoenv.2022.113384>.
- Rauh V, Arunajadai S, Horton M, Perera F, Hoepner L, Barr DB, et al. Seven-year neurodevelopmental scores and prenatal exposure to chlorpyrifos, a common agricultural pesticide. *Environmental health perspectives* 2011; 119: 1196-201. <http://dx.doi.org/10.1289/ehp.1003160>.
- Rauh VA, Garfinkel R, Perera FP, Andrews HF, Hoepner L, Barr DB, et al. Impact of prenatal chlorpyrifos exposure on neurodevelopment in the first 3 years of life among inner-city children. *Pediatrics* 2006; 118: e1845-59. <http://dx.doi.org/10.1542/peds.2006-0338>.
- Rumsey DJ. *Statistics for Dummies*. 2nd edition. Wiley Publishing, Hoboken, NJ. <http://www.dummies.com/education/math/statistics/how-to-interpret-a-correlation-coefficient-r/>. 2011.
- Viel JF, Rouget F, Warembourg C, Monfort C, Limon G, Cordier S, et al. Behavioural disorders in 6-year-

- old children and pyrethroid insecticide exposure: the PELAGIE mother-child cohort. *Occupational and environmental medicine* 2017; 74: 275-281. <http://dx.doi.org/10.1136/oemed-2016-104035>.
- Viel JF, Warembourg C, Le Maner-Idrissi G, Lacroix A, Limon G, Rouget F, et al. Pyrethroid insecticide exposure and cognitive developmental disabilities in children: The PELAGIE mother-child cohort. *Environment International* 2015; 82: 69-75. <http://dx.doi.org/10.1016/j.envint.2015.05.009>.
- Wang Y, Zhang Y, Ji L, Hu Y, Zhang J, Wang C, et al. Prenatal and postnatal exposure to organophosphate pesticides and childhood neurodevelopment in Shandong, China. *Environment International* 2017; 108: 119-126. <http://dx.doi.org/10.1016/j.envint.2017.08.010>.
- Watkins DJ, Fortenberry GZ, Sánchez BN, Barr DB, Panuwet P, Schnaas L, et al. Urinary 3-phenoxybenzoic acid (3-PBA) levels among pregnant women in Mexico City: Distribution and relationships with child neurodevelopment. *Environmental research* 2016; 147: 307-13. <http://dx.doi.org/10.1016/j.envres.2016.02.025>.
- Zhang Y, Han S, Liang D, Shi X, Wang F, Liu W, et al. Prenatal exposure to organophosphate pesticides and neurobehavioral development of neonates: a birth cohort study in Shenyang, China. *PLoS One* 2014; 9: e88491. <http://dx.doi.org/10.1371/journal.pone.0088491>.
