# Supplementary material
Source: PubMed Central journal article supplement (PMC10586492)
Supplement: ehp12097.smcontents.508.pdf [file ehp12097.smcontents.508.pdf]

**Note to readers with disabilities:** *EHP* strives to ensure that all journal content is accessible to all readers. However, some figures and Supplemental Material published in *EHP* articles may not conform to [508 standards](#) due to the complexity of the information being presented. If you need assistance accessing journal content, please contact [ehp508@niehs.nih.gov](mailto:ehp508@niehs.nih.gov). Our staff will work with you to assess and meet your accessibility needs within 3 working days.

### **Supplemental Material**

#### **Association of Prenatal Exposure to Organophosphate, Pyrethroid, and Neonicotinoid Insecticides with Child Neurodevelopment at 2 Years of Age: A Prospective Cohort Study**

Aizhen Wang, Yanjian Wan, Gaga Mahai, Xi Qian, Yuanyuan Li, Shunqing Xu, and Wei Xia

#### **Table of Contents**

**Figure S1.** Spearman's rank correlation analysis was conducted to explore the correlation matrix of the urinary specific gravity (SG)-adjusted concentrations of mOPPs, mPYRs, and mNNIs. Correlation matrix of analytes based on the averaged concentrations over the three trimesters among participants from a birth cohort study in Wuhan, China, 2014–2017 ( $N = 1041$  participants,  $n = 3123$  samples).  $*p < 0.05$ ;  $**p < 0.01$ . The correlation coefficients  $\geq 0.8$  were considered to indicate strong correlation, 0.5–0.8 were moderate, 0.3–0.5 were weak, and  $< 0.3$  were with no correlation ([Rumsey, 2011](#)). Details of chemical abbreviations are provided in Table S3 and the numerical values are listed in Excel Table S2.

**Figure S2.** Spearman's rank correlation analysis was conducted to explore the correlation matrix of the urinary specific gravity (SG)-adjusted concentrations of mOPPs, mPYRs, and mNNIs. Correlation matrix of analytes based on the concentrations in the 1st trimester among the participants from a birth cohort study in Wuhan, China, 2014–2017 ( $N = 1041$  participants,  $n = 1041$  samples).  $*p < 0.05$ ;  $**p < 0.01$ . Details of chemical abbreviations are provided in Table S3 and the numerical values are listed in Excel Table S3.

**Figure S3.** Spearman's rank correlation analysis was conducted to explore the correlation matrix of the urinary specific gravity (SG)-adjusted concentrations of mOPPs, mPYRs, and mNNIs. Correlation matrix of analytes based on the concentrations in the 2nd trimester among the participants from a birth cohort study in Wuhan, China, 2014–2017 ( $N = 1041$  participants,  $n = 1041$  samples).  $*p < 0.05$ ;  $**p < 0.01$ . Details of chemical abbreviations are provided in Table S3 and the numerical values are listed in Excel Table S4.

**Figure S4.** Spearman's rank correlation analysis was conducted to explore the correlation matrix of the urinary specific gravity (SG)-adjusted concentrations of mOPPs, mPYRs, and mNNIs. Correlation matrix of analytes based on the concentrations in the 3rd trimester among the participants from a birth cohort study in Wuhan, China, 2014–2017 ( $N = 1041$  participants,  $n = 1041$  samples).  $*p < 0.05$ ;  $**p < 0.01$ . Details of chemical abbreviations are provided in Table S3 and the numerical values are listed in Excel Table S5.

**Table S1.** Differences on the demographic characteristics of mother-child pairs among the recruited population ( $N = 5112$ ), the population of their children completing the evaluation of Bayley scales at two years old ( $N = 2782$ ), and the study population ( $N = 1041$ ) from Wuhan, China, 2014–2017.

**Table S2.** China Recommendations for total weight gain during pregnancy, by pre-pregnancy body mass index (BMI).

**Table S3.** Related information for target analytes ([Li et al., 2022](#); [Mahai et al., 2022](#)).

**Table S4.** The gradient of mobile phase (flow rate = 0.30 mL/min) for the analysis of target analytes (**except for** DAPs, PNP, and DN-IMI).

**Table S5.** The gradient of mobile phase (flow rate = 0.25 mL/min) for the analysis of DAPs, PNP, and DN-IMI.

**Table S6.** The distribution of the Bayley scores (means  $\pm$  SD) at two years of age based on the average urinary concentrations (ng/mL) of insecticide biomarkers throughout pregnancy for participants from a birth cohort study in Wuhan, China, 2014–2017 ( $N = 1041$  participants,  $n = 3123$  samples).

**Table S7.** Multivariate linear regression model evaluating associations between the average SG-adjusted maternal urinary analytes concentrations (ln-transformed, ng/mL) over three trimesters and children's MDI and PDI at two years of age in participants from a birth cohort study in Wuhan, China, 2014–2017 ( $N = 1041$  participants,  $n = 3123$  samples, data correspond to Figure 1).

**Table S8.** Generalized estimating equation model evaluating trimester-specific associations between SG-adjusted maternal urinary analytes concentrations (ln-transformed, ng/mL) with children's MDI and PDI scores at two years of age in participants from a birth cohort study in Wuhan, China, 2014–2017 ( $N = 1041$  participants,  $n = 1041$  samples for 1st trimester,  $n = 1041$  samples for 2nd trimester,  $n = 1041$  samples for 3rd trimester, data correspond to Figure 2).

**Table S9.** Weighted quantile sum regression (WQSR) analysis for the associations of weighted quantile sum regression index of pesticide biomarkers [based on the concentrations in the 1st trimester ( $N = 553$  participants,  $n = 553$  samples) and the averaged concentrations over the three trimesters ( $N = 553$  participants,  $n = 1659$  samples)] with boy's MDI scores estimated in the repeated holdout validation in participants from a birth cohort study in Wuhan, China, 2014–2017 (Data correspond to Figure 3).

**Table S10.** Weighted quantile sum regression (WQSR) analysis for the associations of weighted quantile sum regression index of pesticide biomarkers [based on the concentrations in the 1st trimester ( $N = 553$  participants,  $n = 553$  samples) and the averaged concentrations over the three trimesters ( $N = 553$  participants,  $n = 1659$  samples)] with boy's PDI scores ( $n = 553$ ) estimated in the repeated holdout validation in participants from a birth cohort study in Wuhan, China, 2014–2017.

**Table S11.** Comparison of the exposure levels and the associations of prenatal exposure to OPPs and PYRs (characterized by biomarkers) with child neurodevelopment observed in our study with other studies.

## References

**Additional File-** Excel Document
